1 **Metabolic evidence for distinct pyruvate pools inside plant mitochondria**

2

3 Xuyen H. Le<sup>1,2</sup>, Chun-Pong Lee<sup>1,2</sup>, Dario Monachello<sup>3,4</sup>, A. Harvey Millar<sup>1,2\*</sup>

4 <sup>1</sup> The University of Western Australia, School of Molecular Sciences, <sup>2</sup> The ARC Centre of  
5 Excellence in Plant Energy Biology, 35 Stirling Highway, Crawley, Perth 6009, Australia,

6 <sup>3</sup> Université Paris-Saclay, CNRS, INRAE, Univ Evry, Institute of Plant Sciences Paris-Saclay  
7 (IPS2), 91405, Orsay, France & <sup>4</sup> Université de Paris, CNRS, INRAE, Institute of Plant  
8 Sciences Paris-Saclay (IPS2), 91405, Orsay, France

9

10 **Corresponding author:** harvey.millar@uwa.edu.au, +61 8 6488 7245

11

12 **Author Contributions:** X.H.L., C.P.L., and A.H.M. designed the research. X.H.L. performed  
13 most of the experiments and data analysis, C.P.L. assisted with some of the mass spectrometry  
14 and data analysis, D.M. performed the interactome analyses. X.H.L., C.P.L., and A.H.M. wrote  
15 the paper.

16

17 **Competing Interest Statement:** There is no conflict of interests

18 **Keywords:** metabolic pools, plant metabolism, mitochondrial metabolism

19

20

21

22

## 23 **Abstract**

24 The majority of the pyruvate inside plant mitochondria is either transported into the matrix  
25 from the cytosol via the mitochondria pyruvate carrier (MPC) or synthesised in the matrix by  
26 alanine aminotransferase (AlaAT) or NAD-malic enzyme (NAD-ME). Pyruvate from these  
27 origins could mix into a single pool in the matrix and contribute indistinguishably to  
28 respiration, or they could maintain a degree of independence in metabolic regulation. Here, we  
29 demonstrated that feeding isolated mitochondria with U-<sup>13</sup>C-pyruvate and unlabelled malate  
30 enables the assessment of pyruvate contribution from different sources to TCA cycle  
31 intermediate production. Imported pyruvate is the preferred source for citrate production even  
32 when the synthesis of NAD-ME-derived pyruvate was optimised. Genetic or pharmacological  
33 elimination of MPC activity removed this preference and allowed an equivalent amount of  
34 citrate to be generated from the pyruvate produced by NAD-ME. Increasing mitochondrial  
35 pyruvate pool size by exogenous addition only affected metabolites from pyruvate transported  
36 by MPC whereas depleting pyruvate pool size by transamination to alanine only affected  
37 metabolic products derived from NAD-ME. Together, these data reveal respiratory substrate  
38 supply in plants involves distinct pyruvate pools inside the matrix that can be flexibly mixed  
39 based on the rate of pyruvate transport from the cytosol. These pools are independently  
40 regulated and contribute differentially to organic acids export from plant mitochondria.

41

## 42 **Significance statement**

43 Pyruvate is the primary respiratory substrate for energy production to support plant growth and  
44 development. However, it is also the starting material of many other pathways. Prioritisation  
45 of respiratory use over other competing pathways would enable a level of control when  
46 pyruvate is delivered to mitochondria via the mitochondrial pyruvate transporter. We  
47 demonstrated the existence of two distinct pyruvate pools in plant mitochondria suggesting  
48 inner mitochondrial organisation allows metabolic heterogeneity, hence metabolic  
49 specialisation. This explains why NAD-ME flux into plant respiration is low and confirms the  
50 prominent link between imported pyruvate and energy production. This compartmentation also  
51 reveals how NAD-ME supplies substrate to the mitochondrial pyruvate exporter in plants,  
52 especially during C4 metabolism.

## 53 Introduction

54 Pyruvate is the main product of cytosolic glycolysis and the fuel for aerobic respiration in most  
55 organisms (1). It is oxidised by the mitochondrial pyruvate dehydrogenase complex (PDC),  
56 producing acetyl-CoA which enters the tricarboxylic acid (TCA) cycle and generates reductant  
57 equivalent for ATP production. In plants, the majority of pyruvate in the mitochondrial matrix  
58 is supplied from three sources: (i) transport from the cytosol via the mitochondria pyruvate  
59 carrier (MPC), (ii) alanine aminotransferase (AlaAT) that interconverts alanine and pyruvate,  
60 and (iii) oxidative decarboxylation of malate via NAD-malic enzyme (NAD-ME). We have  
61 recently shown that the combined action of MPC and the AlaAT is responsible for providing  
62 the bulk of pyruvate to the TCA cycle in *Arabidopsis thaliana*, while NAD-ME only has a  
63 minor role under both *in vivo* and *in vitro* conditions (2). This observation is in contrast to the  
64 long-standing view that NAD-ME is a major contributor to pyruvate-dependent, TCA-cycle  
65 linked respiration due to high malate availability and oxidation rate compared to other  
66 respiratory substrates and the low level of pyruvate in plant cells (3-5). But is consistent with  
67 *in vivo* labelling studies has revealed ME activity accounts for only 3% of the pyruvate  
68 synthesized in respiring maize root tips (6, 7) and 1% in *Xanthium strumarium* leaves (8). It is  
69 plausible that views about the centrality of the respiratory role of malic enzyme have been  
70 significantly influenced by its activity at low pH in purified enzyme samples or isolated  
71 mitochondria (7).

72 We found mitochondria isolated from an MPC1 loss-of-function mutant (*mpc1*) possess a  
73 higher NAD-ME-dependent pyruvate production rate (2), indicating that a metabolic switch  
74 may exist to control pyruvate supply and usage in order to meet specific metabolic and energy  
75 demands under different conditions. One possible explanation for this phenomenon is that plant  
76 mitochondria operate separate pyruvate pools: an imported pyruvate pool that sustains the TCA  
77 cycle, and NAD-ME-derived pyruvate that serves as an emergency valve and is only switched  
78 into TCA cycle metabolism when pyruvate import into the matrix is insufficient to satisfy  
79 cellular energy demand.

80 One known mechanism in plant cells to separate metabolic pools is substrate channelling, either  
81 (i) direct channel formed by interacting enzymes or (ii) increasing the local concentration of  
82 enzymes by bringing enzymes together into clusters, rather than having them distributed  
83 through the cell. It preferably facilitates the transfer of substrates from one active site of one  
84 enzyme to the other sequential enzymes with minimal mixing substrates to the common pool

85 to minimize usage of substrates by competed pathways (9). The occurrence of substrate  
86 channelling has been studied in the TCA cycle, making it one of the preceded examples of  
87 metabolic direct sequential channelling (10, 11). The associative pairing of sequential enzymes,  
88 called a metabolon has a kinetic advantage over free enzymes scouting for substrates from a  
89 single metabolic pool (12), for example between malate dehydrogenase (MDH), citrate  
90 synthase (CS) (12-16). Similarly, purinosome that is responsible for *de novo* purine synthesis  
91 is an enzyme cluster in which reaction rate is enhanced by increased enzyme concentration is  
92 probabilistic rather than direct (17). It was also suggested by the clustering model that flux  
93 would increase by 6-fold for a 2-step pathway and over 100-fold for a 3-step pathway compared  
94 to freely diffusing enzymes within a cell (18).

95 In this study, we explored the evidence for channelling-like phenomena in respiratory  
96 metabolism before the TCA cycle, in the import of pyruvate via MPC and its delivery to the  
97 TCA cycle. This necessitated the use of an intact mitochondrial system to allow pyruvate  
98 transport and use by respiratory metabolism. We assessed the case for channelling by  
99 monitoring how imported pyruvate interacts and competes with pyruvate generated by NAD-  
100 ME in the matrix using co-feeding of mitochondria with multiple labelled and unlabelled  
101 substrates. Our results revealed a preferential usage of transported pyruvate rather than NAD-  
102 ME-derived pyruvate by pyruvate dehydrogenase complex (PDC) and TCA cycle enzymes  
103 which could be reversed when MPC1 was absent or its activity chemically inhibited. This  
104 flexibility indicates the presence of separate pyruvate pools in the matrix and suggests the  
105 occurrence of a regulatory system that is more flexible than physical substrate channelling of  
106 pyruvate between MPC and PDC, more akin to the proposed compartmentation of  
107 mitochondrial metabolism and the apparent movement of metabolites between compartments  
108 in models of mammalian cell metabolism (19-21).

## 109 **Results**

### 110 **Transported pyruvate is converted to citrate but when generated from NAD-ME it is** 111 **preferentially exported from isolated mitochondria**

112 Using selective reaction monitoring-mass spectrometry (SRM-MS) assays to trace the fate of  
113 two substrates simultaneously (2, 22), we assessed the relative contribution of MPC1 and  
114 NAD-ME to metabolites derived from the pyruvate pool in mitochondria from Col-0. Isolated  
115 mitochondria were subjected to a series of  $^{13}\text{C}_3$ -pyruvate concentrations ranging from 0 to 500  
116  $\mu\text{M}$  with a fixed concentration of 500  $\mu\text{M}$  malate at pH 6.4 to determine if a high NAD-ME

117 activity competes with MPC for supplying pyruvate to the TCA cycle *in vitro*. This level of  
118 acidity maximises NAD-ME activity (23). Under these conditions, imported malate can either  
119 be oxidised to oxaloacetate by MDH or oxidised to pyruvate via NAD-ME. Citrate is then  
120 synthesised by combining oxaloacetate with acetyl-CoA made either from exogenously  
121 supplied pyruvate or from pyruvate formed in the matrix via NAD-ME (24). The pyruvate used  
122 in this process can be distinguished by isotopic forms (Figure 1A, 1E). The relative amount of  
123 labelled and unlabelled citrate exported to the extra-mitochondrial medium can be used to  
124 assess the amount of respiratory pyruvate supplied by MPC and NAD-ME, respectively.

125 As expected, increasing exogenous  $^{13}\text{C}_3$ -pyruvate concentration correlated with enhanced  
126 production and export of  $^{13}\text{C}_2$ -citrate and  $^{13}\text{C}_2$ -succinate due to increased pyruvate import  
127 (Figure 1B, 1C). Interestingly, unlabelled pyruvate (via NAD-ME) was released from the  
128 mitochondria at high rates (at 14 nmol/min/mg protein with 500  $\mu\text{M}$  provided pyruvate), at  
129 least seven fold compared to other unlabelled metabolites (Figure 1G). When a smaller  
130 concentration of  $^{13}\text{C}_3$ -pyruvate (0 or 50  $\mu\text{M}$ ) was supplied, a lower amount of NAD-ME-  
131 derived pyruvate from malate exported was detected (7-9 nmol/min/mg protein). However, the  
132 amount of unlabelled citrate and succinate exported by mitochondria was independent of the  
133 unlabelled pyruvate available (Figure 1E, 1F, Supplemental Figure S1A). From these data, we  
134 concluded that the amount of exogenous  $^{13}\text{C}_3$ -pyruvate had little impact on the entry of NAD-  
135 ME-derived pyruvate into the TCA cycle, suggesting a mechanism to select the origin of  
136 pyruvate for entry to the TCA cycle exists in plant mitochondria. Especially when providing  
137 mitochondria with 500  $\mu\text{M}$  pyruvate, MPC-derived citrate was more than 4 times higher in  
138 concentration than NAD-ME-derived citrate.

139 In order to confirm the limited entry of NAD-ME-derived pyruvate into the TCA cycle, NAD-  
140 ME double mutants *nad.me1/nad.me2* (*me1.me2*) and triple mutants of NAD-ME and the MPC  
141 complex *nad.me1/nad.me2/mpc1* (*me1.me2.mpc1*) were fed with a mixture of 500  $\mu\text{M}$  pyruvate  
142 and 500  $\mu\text{M}$  malate. Our previous study showed that mitochondria from wildtype plants (Col-  
143 0) at pH 6.4 showed a rapid increase in unlabelled pyruvate generated from malate by NAD-  
144 ME, while *me1.me2* and *me1.me2.mpc1* did not due to the absence of the NAD-ME enzyme  
145 and wildtype mitochondria at pH 7.2 also failed to accumulate unlabelled pyruvate (NAD-ME  
146 activity is minor) (2). Labelled citrate and downstream labelled TCA metabolites derived from  
147  $^{13}\text{C}_3$ -pyruvate imported via MPC were steadily produced and exported, proving that malate  
148 oxidation to OAA by MDH, pyruvate oxidation by PDC and other TCA cycle machineries  
149 were not defective in these mitochondria (2). Despite this, the rate of unlabelled citrate exported

150 by wildtype at pH 6.4 was extremely low and did not show a significant difference to that by  
151 *mel.me2* and *mel.me2.mpc1* and Col-0 at pH 7.2 (Figure 1H), suggesting that pyruvate  
152 produced by NAD-ME at pH 6.4 in the matrix was mostly exported and not oxidised by PDC  
153 for citrate synthesis (Figure 1E). Other downstream unlabelled metabolites, such as 2-  
154 oxoglutarate and succinate, showed similar trends with no significant amounts produced  
155 (Figure 1I, Supplemental Figure S1B). This confirms the hypothesis that there is a preference  
156 of using imported pyruvate for TCA cycle metabolism and we cannot treat pyruvate from  
157 different origins as single pool.

### 158 **No evidence for physical interaction of MPC and PDC**

159 To investigate the possibility of substrate channelling which could help explain the observed  
160 metabolic compartmentation phenomena, we first looked at reports of protein-protein  
161 interaction in the mitochondria. But we found no evidence for PDC subunit proteins binding to  
162 MPC1 in plants (25, 26), yeast (27, 28) or mammalian cells (15, 29-32). To look instead for  
163 evidence of MPC1 binding to PDC subunits, we conducted a high-throughput yeast two-hybrid  
164 (Y2H) assay using MPC1 as bait to screen for interactions with about 12000 proteins in the  
165 Arabidopsis library to probe the possible interaction between MPC and PDC (Supplemental  
166 Table 1). The library includes the PDC components E1 $\alpha$ , E1 $\beta$ , E2 and E3 (At1g59900,  
167 At1g24180, At5g50850, At3g52200, At3g13930, At1g54220, At1g48030, At3g17240) and  
168 other TCA cycle enzymes. High throughput screening failed to identify any physical  
169 interactions of MPC1 with PDC subunits, suggesting the presence of distinct pyruvate pools is  
170 not likely to result from a clear physical association that promotes substrate channelling.  
171 GRXS17 (At4g04950) and GRX480 (At1g28480) were included as positive control baits in  
172 the same screen to validate the experiment, and known interactors were confirmed by colony  
173 sequencing (for GRXS17, known interactors BolA2-AT5G09830, BolA4-AT5G17560 and  
174 Dre2-AT5G18400 (33); for GRX480, known interactors TGA3-AT1G22070 and TGA7-  
175 AT1G77920 (34)).

### 176 **The use of mitochondrial NAD-ME-derived pyruvate by PDC is stimulated by 177 eliminating MPC1 activity either genetically or chemically**

178 We next examined if the preference of PDC for MPC-pyruvate over NAD-ME-pyruvate is  
179 constitutive or if it changes depending on the pyruvate-supply in isolated mitochondria. We  
180 have recently shown that MPC1 is required for pyruvate import from the cytosol into  
181 mitochondrial matrix by monitoring the increase in labelled citrate and export of downstream

182 TCA cycle metabolites at pH 7.2 (2). Under conditions that optimise NAD-ME activity (pH  
183 6.4), the loss of MPC1 resulted in the lack of mitochondrial  $^{13}\text{C}$ -pyruvate import, leading to a  
184 substantial reduction in the export of labelled citrate, succinate and malate to the  
185 extramitochondrial medium compared to wildtype and a *mcp1* complemented line (Figure 2A-  
186 D, Supplemental Figure S2A). While there was a lack of usage of NAD-ME-derived unlabelled  
187 pyruvate inside wildtype mitochondria, we observed a substantial and progressive increase in  
188 unlabelled citrate, 2-oxoglutarate and succinate concentrations in the extramitochondrial  
189 medium of *mcp1* samples (Figure 2E-G, Supplemental Figure S2B). Less unlabelled pyruvate  
190 was exported by *mcp1* mitochondria compared to wildtype, indicating that more NAD-ME-  
191 generated pyruvate was consumed by *mcp1* mitochondria than that by wildtype and the *mcp1*  
192 complemented line (Figure 2H). This suggests that MPC1 loss-of-function enhanced the rate  
193 of NAD-ME-derived pyruvate being oxidised by PDC significantly more than in wildtype.

194 We also included UK-5099, a non-competitive MPC inhibitor (35-38) into our feeding  
195 experiments to mimic the effect of knocking out MPC1. Figure 2 showed no significant  
196 difference in the usage of pyruvate produced from either NAD-ME or MPC between Col-0,  
197 *mcp1* and *mcp1/gMPC1* in the presence of this MPC inhibitor. All UK-5099 treated  
198 mitochondria showed a similar pattern of unlabelled pyruvate and citrate export to *mcp1*  
199 mitochondrial without UK-5099 treatment (Figure 2F, 2H, Supplemental Figure s2). UK-5099  
200 treatment blocked transport and usage of exogenously-provided pyruvate while it enhanced the  
201 usage of pyruvate from NAD-ME in Col-0 and *mcp1/gMPC1* in the same way as knockout of  
202 MPC in *mcp1*. The flexibility in using NAD-ME-derived pyruvate to provide carbon for the  
203 TCA cycle when the primary source of pyruvate is unavailable further confirms that physical  
204 channelling is not the cause of the preferential use of imported pyruvate for supporting the  
205 TCA cycle.

206 To independently confirm this effect, we conducted a separate label swap mitochondrial  
207 feeding experiment with a combination of pyruvate and  $^{13}\text{C}_4$ -malate with/without UK-5099.  
208 The results consistently showed that *mcp1* mitochondria and UK-5099 treated mitochondria  
209 were able to use pyruvate made internally to mitochondria by NAD-ME to drive the TCA cycle,  
210 but this did not occur in wildtype or the *mcp1* complemented line (Supplemental Figure S3). It  
211 was evidenced by the steady increase in NAD-ME-derived citrate and succinate concentration  
212 in the form of  $^{13}\text{C}_6$ -citrate and  $^{13}\text{C}_4$ -succinate (Supplemental Figure S3B). Taken together,  
213 pyruvate from NAD-ME can only be efficiently accessed by PDC when MPC1 is either not  
214 present or chemically inactivated. This means there are effectively two mitochondrial pyruvate

215 pools in plant mitochondria that can be accessed by PDC, but it depends on the presence of  
216 pyruvate import.

### 217 **Total amount of TCA cycle metabolites produced from NAD-ME-generated pyruvate** 218 **remained unchanged regardless of genotypic or treatment effect**

219 Although the maximal activity of NAD-ME was shown to be similar in wildtype, *mpc1* and  
220 *mpc1/gMPC1* (2), we surmised the difference in unlabelled pyruvate production rate between  
221 wildtype and *mpc1* might underlie the variation in metabolic regulation under *in vitro*  
222 conditions. In order to assess NAD-ME activity of wildtype, *mpc1* and *mpc1/gMPC1* with and  
223 without UK-5099, we calculated and compared the export rates of the downstream products  
224 from NAD-ME, namely unlabelled pyruvate, citrate, succinate and 2-oxoglutarate when they  
225 were fed with 500 $\mu$ M  $^{13}\text{C}_3$ -pyruvate and 500 $\mu$ M malate at pH 6.4. Unlabelled fumarate and  
226 malate derived from this pathway cannot be measured as malate had the same isotopically  
227 labelled form as exogenously provided malate, and fumarate production was comparatively too  
228 low to be quantifiable. Our results showed that *mpc1* and UK-5099-treated mitochondria  
229 displayed no difference in the total concentration of metabolites derived from the NAD-ME  
230 pathway (Figure 3B, Supplemental Figure S4A) while they displayed obvious deficiency in  
231 total MPC-derived metabolite amount to that of Col-0 (Figure 3A). However, the export rates  
232 of individual NAD-ME-derived metabolites were clearly different; wildtype exported the  
233 majority as NAD-ME-derived pyruvate whereas *mpc1* and UK-5099 treated mitochondria  
234 converted more than half of this pyruvate into TCA cycle metabolites (Figure 3). Swapping  
235 from supplying  $^{13}\text{C}_3$ -pyruvate and unlabelled malate to  $^{13}\text{C}_4$ -malate and unlabelled pyruvate  
236 showed consistent results, indicating that malic enzyme activity was similar amongst genotypes  
237 and treatments but the pyruvate generated had significantly different fates when MPC1 was  
238 absent or non-functional (Supplemental Figure S4B-C). Thus, the bias in pyruvate usage is not  
239 due to different pyruvate production rate by NAD-ME.

### 240 **Alanine aminotransferase (AlaAT) can consume NAD-ME-derived pyruvate but not** 241 **MPC imported pyruvate**

242 Our results so far suggested PDC can prioritise imported pyruvate over NAD-ME-derived  
243 pyruvate for generating TCA cycle intermediates. To explore this possibility, we introduced a  
244 competitive co-substrate, glutamate, to drive the mitochondrial alanine aminotransferase  
245 (AlaAT) in the direction of pyruvate consumption (i.e. pyruvate + glutamate  $\rightarrow$  alanine + 2-  
246 oxoglutarate) to compete for pyruvate in isolated mitochondria (Figure 4A, 4E) (39). In an



247 equilibrium system, pyruvate imported by MPC or generated by NAD-ME would be converted  
248 by AlaAT and reduce the export rate of the corresponding citrate product. If one source of  
249 pyruvate is preferential, the export rate of citrate derived from it would be resistant to change.  
250 We found glutamate addition to mitochondria significantly deteriorated the unlabelled citrate  
251 export rate and pyruvate export rate consistent with competition for unlabelled pyruvate in Col-  
252 0 and the complemented line (Figure 4F-G, Supplemental Figure S5B). However, the rate of  
253  $^{13}\text{C}_2$ -citrate export,  $^{13}\text{C}_2$ -succinate and  $^{13}\text{C}_2$ -malate did not change upon the addition of  
254 glutamate in all three genotypes, suggesting restricted access to imported pyruvate by AlaAT  
255 (Figure 4B-D, Supplemental Figure S5A). These results show that AlaAT is more likely to  
256 have access to NAD-ME-derived pyruvate than imported pyruvate in wildtype. In *mpc1*  
257 mitochondria, the export rate of unlabelled citrate derived from the NAD-ME pathway was not  
258 altered in the presence of glutamate. This suggests that, in the absence of MPC, PDC can access  
259 pyruvate from NAD-ME just with a lower rate in the presence of glutamate. Therefore, the  
260 preferential use of imported pyruvate for supporting the TCA cycle could be explained by  
261 distinct pools of pyruvate accessible to PDC depending on the rate of pyruvate import.

## 262 Discussion

263 MPC plays an essential role in the mitochondrial pyruvate-supplying pathway by carrying more  
264 supply to the TCA cycle *in vivo* than AlaAT or NAD-ME (2). MPC-dependent pyruvate import  
265 alone can support normal growth and development of Arabidopsis seedlings without the  
266 presence of the other two pathways, but not AlaAT or NAD-ME alone (2) which lead to  
267 significant growth impairments. Here we show a regulatory mechanism exists to kinetically  
268 prioritise MPC over other pyruvate-supplying pathways. Specifically, we provided genetic and  
269 biochemical evidence for Arabidopsis mitochondria preferring imported pyruvate via MPC for  
270 the TCA cycle operation over pyruvate synthesised inside the mitochondrial matrix by NAD-  
271 ME. Our data indicated that imported pyruvate and matrix-derived pyruvate effectively operate  
272 as two independent pools that do not homogeneously mix in the mitochondria. The rate of  
273 contribution of different pathways to the mitochondrial pyruvate pool could not explain the  
274 substantial bias of imported pyruvate usage over malate-derived pyruvate usage (Figure 1 and  
275 4). The NAD-ME pathway provided about 90% of the total citrate in *mpc1* whereas MPC  
276 accounted for more than 90% of the total citrate in *me1.me2* (Supplemental Figure S6). When  
277 both pathways were available, we would expect their relative contribution to the TCA cycle to  
278 be much more evenly distributed. However, we found that 80% of citrate was still derived from  
279 MPC-transported pyruvate (Supplemental Figure S6).

## 280 **Do MPC and PDC form a metabolon?**

281 Transient metabolons regulating the metabolic flux through the association and dissociation of  
282 components were observed for the glycolytic pathway in mammals, yeast, and plants (40-42),  
283 polyamine metabolism in plants (43), and secondary metabolic pathways in plants (44-47). Our  
284 results could be interpreted as preliminary evidence for a metabolon existing between enzymes  
285 of the mitochondrial pyruvate-supplying pathways in response to metabolic regulation and  
286 substrate availability. However, to date there is no protein-protein interaction data to support a  
287 physical association between MPC and any of the subunits of PDC, despite extensive studies  
288 being performed to define mitochondrial protein-protein interactions in plants, yeasts and  
289 mammals. These have included the use of affinity purification-mass spectrometry (AP-MS),  
290 cross-linking mass spectrometry (XL-MS), proximity-dependent biotinylation, biomolecular  
291 fluorescent complementation assay (BiFC), split luciferase, and Y2H screening assays (15, 25-  
292 32). Also, quantitative proteomics in Arabidopsis mitochondria has shown the abundance of  
293 PDC subunits are all ~5 times greater than MPC1 (48), hence at least 80% of PDC could not  
294 be associated with MPC1 at any one time. This is inconsistent with a hypothesis that MPC1  
295 could physically associate with all PDC catalytic sites and prevent interaction with pyruvate  
296 from other sources. Rather, it appears more likely that heterogeneous zones inside  
297 mitochondria may be the reason for the observed separation of pyruvate pools. PDC has been  
298 suggested to have close association with the inner membrane as PDC isolation is more effective  
299 with detergents in animals (49, 50) and a higher portion of PDC remains associated with  
300 mitochondrial membranes in plants than other TCA cycle enzymes (51) while NAD-ME is a  
301 soluble enzyme that is free in the matrix in animals (52-54) and plants (7, 51). Additionally,  
302 immunolabelling studies in human cell cultures show that PDC is heterogeneously distributed,  
303 being found in clusters within the matrix (55).

304 Hypotheses that there are multiple pyruvate pools were evident in literature long before the  
305 pyruvate transporter itself was identified. U-<sup>13</sup>C-glucose or U-<sup>13</sup>C-lactate labelling in  
306 mammalian cells was used historically to develop models of compartmentation of  
307 mitochondrial metabolism that also suggests separate pyruvate pools. Most notably one  
308 originating from glucose and is used for releasable citrate, and another pool of pyruvate that  
309 seemed to function as a substrate for the TCA cycle (21). In *Saccharomyces cerevisiae*, there  
310 is also evidence that pyruvate from different origins is used for different purposes, i.e.  
311 exogenous pyruvate goes to PDH in mitochondria while glycolytic channels provide pyruvate  
312 to pyruvate decarboxylase in the cytosol (56). In *Tetrahymena*, pyruvate-derived acetyl-CoA,

313 the product of PDC activity, is independent from acetate-derived acetyl-CoA pool (57).  
314 Pyruvate-derived CoA is oxidised for respiration, while acetate-derived CoA is used for fatty  
315 acid synthesis via citrate and fatty-acid derived acetyl-CoA is used for gluconeogenesis via  
316 malate (58). Our results show that NAD-ME-derived pyruvate and imported pyruvate do not  
317 mix in the mitochondrial matrix using an *in organello* system.

### 318 **The potential impact of pyruvate pools on primary metabolism**

319 Metabolic pathways with separate pools of metabolic intermediates occur in all three processes  
320 of respiration; glycolysis, TCA cycle and the electron transport chain. A set of respiration-  
321 specialised metabolite pools insulated from other metabolic processes and enabling rapid and  
322 efficient energy production, is therefore a key feature of living organisms. There is good  
323 evidence that glycolytic enzymes interact with VDAC proteins of the outer mitochondrial  
324 membrane by anchoring glycolytic enzymes to the mitochondrial surface (42, 59, 60). Fructose  
325 1,6-bisphosphate, dihydroxyacetone phosphate, and glyceraldehyde 3-phosphate are preferred  
326 to be consumed in glycolysis rather than diluted into the bulk cytosol as shown by stable isotope  
327 dilution experiments in Arabidopsis (60). Our results show that the metabolic preference for  
328 respiratory role is also true for imported pyruvate in the mitochondria. Most of pyruvate made  
329 by glycolysis readily enters the TCA cycle to immediately generate reducing power for ATP  
330 production without being used by other competing pathways (61). Similarly, in glial cells the  
331 pyruvate pool with glycolytic origin, is more closely related to mitochondrial pyruvate, which  
332 is oxidized via TCA cycle activity (62). Based on the rate of citrate export, imported pyruvate  
333 is directed with high efficiency as consistently over 80% of citrate was made from imported  
334 pyruvate (Supplemental Figure S6) to ensure the respiration efficiency.

335 An important component of metabolic regulation is specialization. Our results show that in  
336 plants, the imported pyruvate pool is designated to provide a carbon backbone to make citrate,  
337 whereas NAD-ME-derived pyruvate is destined to be exported to the cytosol for other cellular  
338 roles (Figure 5). The activity of NAD-ME and the mitochondrial pyruvate exporter ensures the  
339 integrity of the photosynthetic metabolism in C4 plants by the recycling of carbon  
340 intermediates. The export of NAD-ME-derived pyruvate from mitochondria is essential for  
341 PEP synthesis in the chloroplasts to accept CO<sub>2</sub> in the mesophyll cells (63-66). NAD-ME  
342 releases CO<sub>2</sub> from malate which allow carbon incorporation by Rubisco in the bundle sheath  
343 cells. The whole process helps to minimize photorespiration and energy wastage, thereby  
344 increasing plant yield. While the identity of the plant mitochondrial pyruvate exporter is

345 currently unknown, our results suggest that the metabolic arrangement of pyruvate pools  
346 already operate in C3 plants to facilitate the non-mitochondrial usage of NAD-ME-derived  
347 pyruvate (67-69), albeit at a much lower rate than in C4 plants (70). In C3 plants like rice and  
348 Arabidopsis, pyruvate generated by NAD-ME from imported malate is exported to be recycled  
349 into phosphoenolpyruvate in the cytosol and plastids to restore the pH balance in response to  
350 water stress (71, 72). Moreover, pyruvate exported from mitochondria is potentially the main  
351 source of acetyl CoA to synthesise fatty acids in plastids for generating essential cellular  
352 components and signals (73-75). In summary, our data shows a process by which there is a  
353 specialized role of NAD-ME-derived pyruvate, when MPC is operating, not to supply  
354 substrates for respiration but to maintain photosynthesis, biosynthesis and potentially mediate  
355 metabolic stress responses. This metabolic specialisation explains the contribution of NAD-  
356 ME to reduction of the matrix NADH pool and thus some respiratory flux in Arabidopsis and  
357 other plants (6-8) but argues that the assumption of NAD-ME being a main source of pyruvate  
358 for the TCA-cycle is not generally applicable.

359 Our findings show that pyruvate pools are both separated but also metabolically flexible,  
360 proven by genetics and inhibitors. This metabolic distinction allows individual turn over, flux  
361 regulation, equilibrium and hence specialised response of each metabolic pool to cellular and  
362 environmental stimuli. The presence of distinct mitochondrial pyruvate pools due to  
363 mitochondrial anatomical and biochemical features suggests similar regulation of other  
364 mitochondrial metabolites could exist in order to improve the efficiency and dynamic nature  
365 of the respiratory pathway (76). It has been suggested previously that there could be two  
366 different malate pools in plant mitochondria when castor bean mitochondria were incubated  
367 with <sup>14</sup>C-pyruvate and malate. TCA cycle-generated <sup>14</sup>C-malate is exported as no appreciable  
368 radiolabel can be found in CO<sub>2</sub> (77). The existence of a MDH-CS metabolon also indicates that  
369 there could be at least two pools of malate, one generates OAA for the TCA cycle and the other  
370 consumed by other pathways such as NAD-ME (12-15). There is also a prima-facie case for at  
371 least two pools of citrate due to a citrate synthase–citrate exporter interaction (78). Metabolic  
372 plasticity is not compromised by having two mitochondrial pyruvate pools. By having a  
373 flexible secondary pyruvate pool, plant mitochondria have the ability to use NAD-ME-derived  
374 pyruvate to generate TCA intermediates as a fine-tuning regulation mechanism of pyruvate  
375 metabolism rather than being alternative substrates for respiration. Understanding the  
376 conditions and mechanism that enable NAD-ME contribution to the TCA cycle metabolism *in*

377 *vivo* will be beneficial for the incorporation of the superior C4 characteristics into future C3  
378 crops.

## 379 **Materials and Methods**

### 380 **Plant material and growth conditions**

381 The MPC1 T-DNA insertion line SALK008465 was obtained from the Arabidopsis Biological  
382 Resource Center (<https://abrc.osu.edu/>). *mpc1* and *mel.me2* seeds were previously  
383 characterised and published (2, 7) and *mel.me2* seeds were obtained from Professor Verónica  
384 G. Maurino (University of Bonn). *mel.me2.mpc1* and *mpc1/gMPC1* were generated and  
385 confirmed as described previously (2).

386 Arabidopsis seeds were surface sterilized and dispensed into one-half strength Murashige and  
387 Skoog liquid media (1.1g/L agar, 0.4 g/L MES, 10g/L sucrose) within enclosed, sterilized 100  
388 mL polypropylene containers. The containers were rotated on the shaker in the long-day  
389 conditions with 16 hours light, 8 hours dark and 60% humidity (110  $\mu\text{mol s}^{-1} \text{m}^{-2}$  light  
390 intensity with tubular fluorescent lighting) and seedlings were harvested after two weeks.

### 391 **Isolation of mitochondria**

392 Mitochondria were isolated from 2-week-old Arabidopsis seedlings as described previously  
393 (79).

394

### 395 **Substrate feeding of isolated mitochondria**

396 The detailed methods and materials for MS-based mitochondria feeding assays are described  
397 previously (80). In short, 100  $\mu\text{g}$  isolated mitochondria were mixed with substrates (a mixture  
398 of pyruvate and malate), cofactors (2mM  $\text{NAD}^+$ , 0.2 mM TPP and 0.012 mM CoA) and 1mM  
399 ADP (for ATP synthesis) in a final volume of 200  $\mu\text{l}$ . At specified time, this reaction mixture  
400 was layered on top of silicon oil (AR200, 100  $\mu\text{l}$ ) which was layered above the stopping sucrose  
401 solution (0.5 M sucrose, pH 1.0). Substrate transport was stopped by rapid centrifugation (12  
402 000 g for 3 min) to harvest the mitochondria at the bottom of the tube. 5  $\mu\text{l}$  of the extra-  
403 mitochondrial medium (the top layer) was collected and extracted for quantitative analysis by  
404 LC-SRM-MS.

### 405 **Analyses of metabolites by LC-SRM-MS**

406 Samples were analysed by an Agilent 1100 HPLC system coupled to an Agilent 6430 Triple  
407 Quadrupole (QQQ) mass spectrometer equipped with an electrospray ion source as described  
408 previously (2). Chromatographic separation was performed on a Kinetex C18 column, using  
409 0.1% formic acid in water (solvent A) and 0.1% formic acid in methanol (solvent B) as the  
410 mobile phase for binary gradient elution. The elution gradient was 18% B at 1 min, 90% B at  
411 10 min, 100% B at 11 min, 100% B at 12 min, 18% B at 13 min, and 18% B at 20 min. The  
412 column flow rate was 0.3 mL/min; the column temperature is 40 °C, and the autosampler was  
413 kept at 10 °C. Selective reaction monitoring (SRM) transitions for targeted TCA cycle  
414 metabolites and their isotopically labelled versions are shown previously (2). Data acquisition  
415 was performed using Agilent MassHunter Workstation Data Acquisition software. Metabolite  
416 quantitation of both unlabelled and labelled metabolites was carried out based on calibration  
417 curves obtained with unlabelled authentic standards and normalized against internal standards.

#### 418 **Interactome analyses**

419 The improved Y2H high-throughput binary interactome mapping liquid pipeline described (81)  
420 is an adaptation of a previously developed interactome (82). The same low copy number yeast  
421 expression vectors expressing DB-X and AD-Y hybrid proteins and the two yeast two hybrid  
422 strains, *Saccharomyces cerevisiae* Y8930 and Y8800 were used. The reporter genes GAL2-  
423 ADE2 and LYS2::GAL1-HIS3 are integrated into the yeast genome. Expression of the GAL1-  
424 HIS3 reporter gene was tested with 1 mM 3AT (3-amino-1,2,4- triazole, a competitive inhibitor  
425 of the HIS3 gene product). Y8800 MAT $\alpha$  and Y8930 MAT $\alpha$  yeast strains were transformed  
426 with AD-Y and DB-X constructs, respectively and DB-X strains were tested for to be auto-  
427 activation of the GAL1- HIS3 reporter gene in the absence of AD-Y plasmid. MPC1 was  
428 cloned into DB-X construct acting as baits and screened against 12000 proteins in  
429 Arabidopsis library cloned into AD-Y construct prior to Y2H screening.

430 Briefly, DB-X baits expressing yeasts were individually grown (30°C for 72 h) into 50-mL  
431 polypropylene conical tubes containing 5 mL of fresh selective media (Sc-Leucine; Sc-Leu),  
432 then pooled (max 50 individual bait yeast strains) and 50  $\mu$ L plated into 384-well low profile  
433 microplates. Glycerol stocks of the (AD)-AtORFeome collection corresponding to 127 96-well  
434 plates were thawed, replicated using the colony picker Qpix2 XT into 32 384-well plates filled  
435 with 50  $\mu$ L of fresh selective media (Sc-Tryptophane; Sc-Trp) and incubated at 30 °C for 72 h.  
436 Culture plates corresponding to the DB-baits pools and AD-collection were replicated into  
437 mating plates filled with YEPD media and incubated at 30 °C for 24 h. Mating plates were

438 then replicated into screening plates filled with 50  $\mu$ L of fresh Sc-Leu-Trp-Histidine + 1 mM  
439 3AT media and incubated at 30 °C for 5 days. Only diploid yeast with interacting couples can  
440 growth in this media. In order to identify primary positives, the OD600 of the 384-well  
441 screening plates was measured using a microplate-reader Tecan Infinite M200 PRO. Yeast  
442 cultures identified as positive interactions were picked from selective media and protein pairs  
443 were identified by de-pooling of DB-baits in a targeted matricial liquid assay in which all the  
444 DB-baits were individually tested against all the positive AD-proteins. Identified pairs were  
445 cherry-picked and checked by DNA sequencing.

#### 446 **Statistical analysis**

447 All statistical analyses were performed using the two-sided *t* test function built in Excel 2010.  
448 Statistical tests and the number of biological replicates are indicated in figure legends.  
449 Biological replicates indicate samples that were collected from different batches of plants  
450 grown under the same conditions except biological replicates for transcript analysis and  
451 metabolite analysis were samples collected from different plants grown at the same time.

452

#### 453 **Acknowledgements**

454 This work is supported by the Australian Research Council Centre of Excellence in Plant  
455 Energy Biology (CE140100008) and X.H.L. is a Forrest Scholar supported by the Forrest  
456 Research Foundation and a receiver of Research Training Program scholarships from the  
457 Department of Education, Skills and Employment in the Australian Government.

458

## 459 References

- 460 1. Millar AH, Small ID, Day DA, & Whelan J (2008) Mitochondrial biogenesis and  
461 function in *Arabidopsis*. *Arabidopsis Book* 6:e0111.
- 462 2. Le XH, Lee C-P, & Millar AH (2021) The mitochondrial pyruvate carrier (MPC)  
463 complex mediates one of three pyruvate-supplying pathways that sustain *Arabidopsis*  
464 respiratory metabolism. *Plant Cell* 33(8):2776-2793.
- 465 3. Day DA & Hanson JB (1977) Pyruvate and malate transport and oxidation in corn  
466 mitochondria. *Plant Physiol* 59(4):630-635.
- 467 4. Tronconi MA, Maurino VG, Andreo CS, & Drincovich MF (2010) Three different  
468 and tissue-specific NAD-malic enzymes generated by alternative subunit association  
469 in *Arabidopsis thaliana*. *J Biol Chem* 285(16):11870-11879.
- 470 5. Tronconi MA, *et al.* (2008) *Arabidopsis* NAD-malic enzyme functions as a  
471 homodimer and heterodimer and has a major impact on nocturnal metabolism. *Plant*  
472 *Physiol* 146(4):1540-1552.
- 473 6. Dieuaide-Noubhani M, Raffard G, Canioni P, Pradet A, & Raymond P (1995)  
474 Quantification of Compartmented Metabolic Fluxes in Maize Root Tips Using Isotope  
475 Distribution from <sup>13</sup>C- or <sup>14</sup>C-Labeled Glucose. *J Bioll Chem* 270(22):13147-13159.
- 476 7. Edwards S, Nguyen BT, Do B, & Roberts JKM (1998) Contribution of malic enzyme,  
477 pyruvate kinase, phosphoenolpyruvate carboxylase, and the krebs cycle to respiration  
478 and biosynthesis and to intracellular pH regulation during hypoxia in maize root tips  
479 observed by nuclear magnetic resonance imaging and gas chromatography-mass  
480 spectrometry. *Plant Physiol* 116(3):1073-1081.
- 481 8. Tcherkez G, *et al.* (2009) In folio respiratory fluxomics revealed by <sup>13</sup>C isotopic  
482 labeling and H/D isotope effects highlight the noncyclic nature of the tricarboxylic  
483 acid "cycle" in illuminated leaves. *Plant Physiol* 151(2):620-630.
- 484 9. Winkel BS (2004) Metabolic channeling in plants. *Annu Rev Plant Biol* 55:85-107.
- 485 10. Srere PA & Mosbach K (1974) Metabolic compartmentation: symbiotic, organellar,  
486 multienzymic, and microenvironmental. *Annu Rev Microbiol* 28(0):61-83.
- 487 11. Sweetlove LJ & Fernie AR (2018) The role of dynamic enzyme assemblies and  
488 substrate channelling in metabolic regulation. *Nat Commun* 9(1):2136-2136.
- 489 12. Srere PA (1985) The metabolon. *Trends Biochem Sci* 10(3):109-110.
- 490 13. Morgunov I & Srere PA (1998) Interaction between citrate synthase and malate  
491 dehydrogenase: substrate channeling of oxaloacetate. *J Biol Chem* 273(45):29540-  
492 29544.
- 493 14. Vélot C, Mixon MB, Teige M, & Srere PA (1997) Model of a quinary structure  
494 between Krebs TCA cycle enzymes: a model for the metabolon. *Biochemistry*  
495 36(47):14271-14276.
- 496 15. Wu F & Minter S (2015) Krebs cycle metabolon: structural evidence of substrate  
497 channeling revealed by cross-linking and mass spectrometry. *Angew Chem Int Ed*  
498 *Engl* 54(6):1851-1854.
- 499 16. Robinson JB, Jr., Inman L, Sumegi B, & Srere PA (1987) Further characterization of  
500 the Krebs tricarboxylic acid cycle metabolon. *J Biol Chem* 262(4):1786-1790.
- 501 17. Zhao H, *et al.* (2015) Quantitative analysis of purine nucleotides indicates that  
502 purinosomes increase de novo purine biosynthesis. *J Biol Chem* 290(11):6705-6713.
- 503 18. Castellana M, *et al.* (2014) Enzyme clustering accelerates processing of intermediates  
504 through metabolic channeling. *Nat Biotechnol* 32(10):1011-1018.
- 505 19. Sonnewald U, *et al.* (1993) NMR spectroscopic studies of <sup>13</sup>C acetate and <sup>13</sup>C  
506 glucose metabolism in neocortical astrocytes: evidence for mitochondrial  
507 heterogeneity. *Dev Neurosci* 15(3-5):351-358.



- 508 20. Cruz F, *et al.* (2001) Intracellular compartmentation of pyruvate in primary cultures of  
509 cortical neurons as detected by <sup>13</sup>C NMR spectroscopy with multiple <sup>13</sup>C labels. *J*  
510 *Neurosci Res* 66(5):771-781.
- 511 21. Waagepetersen HS, Sonnewald U, Larsson OM, & Schousboe A (2001) Multiple  
512 compartments with different metabolic characteristics are involved in biosynthesis of  
513 intracellular and released glutamine and citrate in astrocytes. *Glia* 35(3):246-252.
- 514 22. Lee CP, *et al.* (2021) The versatility of plant organic acid metabolism in leaves is  
515 underpinned by mitochondrial malate–citrate exchange. *Plant Cell*. doi:  
516 10.1093/plcell/koab223.
- 517 23. Willeford K & Wedding R (1987) pH effects on the activity and regulation of the  
518 NAD-malic enzyme. *Plant Physiol* 84:1084-1087.
- 519 24. Oliver DJ & Walker GH (1984) Characterization of the transport of oxaloacetate by  
520 pea leaf mitochondria. *Plant Physiol* 76(2):409.
- 521 25. Zhang Y, *et al.* (2017) Protein-protein interactions and metabolite channelling in the  
522 plant tricarboxylic acid cycle. *Nat Commun* 8:15212.
- 523 26. Arabidopsis Interactome Mapping C (2011) Evidence for network evolution in an  
524 Arabidopsis interactome map. *Science (New York, N.Y.)* 333(6042):601-607.
- 525 27. Jin K, *et al.* (2015) Yeast mitochondrial protein-protein interactions reveal diverse  
526 complexes and disease-relevant functional relationships. *J Proteome Res* 14(2):1220-  
527 1237.
- 528 28. Linden A, *et al.* (2020) A cross-linking mass spectrometry approach defines protein  
529 interactions in yeast mitochondria. *Mol Cell Proteomics* 19(7):1161-1178.
- 530 29. Go CD, *et al.* (2021) A proximity-dependent biotinylation map of a human cell.  
531 *Nature* 595(7865):120-124.
- 532 30. D'Souza SF & Srere PA (1983) Cross-linking of mitochondrial matrix proteins in situ.  
533 *Biochim Biophys Acta* 724(1):40-51.
- 534 31. Liu F, Lössl P, Rabbitts BM, Balaban RS, & Heck AJR (2018) The interactome of  
535 intact mitochondria by cross-linking mass spectrometry provides evidence for  
536 coexisting respiratory supercomplexes. *Mol Cell Proteomics* 17(2):216-232.
- 537 32. Schweppe DK, *et al.* (2017) Mitochondrial protein interactome elucidated by  
538 chemical cross-linking mass spectrometry. *Proc Natl Acad Sci* 114(7):1732-1737.
- 539 33. Couturier J, *et al.* (2014) Monothiol Glutaredoxin–Bola interactions: redox control of  
540 *Arabidopsis thaliana* Bola2 and SufE1. *Mol plant* 7(1):187-205.
- 541 34. Ndamukong I, *et al.* (2007) SA-inducible Arabidopsis glutaredoxin interacts with  
542 TGA factors and suppresses JA-responsive PDF1.2 transcription. *Plant J* 50(1):128-  
543 139.
- 544 35. Nagampalli R, *et al.* (2018) Human mitochondrial pyruvate carrier 2 as an  
545 autonomous membrane transporter. *Sci Rep* 8(1):3510.
- 546 36. Halestrap AP (1976) The mechanism of the inhibition of the mitochondrial pyruvate  
547 transportater by alpha-cyanocinnamate derivatives. *Biochem J* 156(1):181-183.
- 548 37. Paradies G (1984) Interaction of  $\alpha$ -cyano[<sup>14</sup>C]cinnamate with the mitochondrial  
549 pyruvate translocator. *Biochim Biophys Acta* 766(2):446-450.
- 550 38. Hildyard JC, Ammala C, Dukes ID, Thomson SA, & Halestrap AP (2005)  
551 Identification and characterisation of a new class of highly specific and potent  
552 inhibitors of the mitochondrial pyruvate carrier. *Biochim Biophys Acta* 1707(2-3):221-  
553 230.
- 554 39. Wheeldon I, *et al.* (2016) Substrate channelling as an approach to cascade reactions.  
555 *Nat Chem* 8(4):299-309.

- 556 40. Puchulu-Campanella E, *et al.* (2013) Identification of the components of a glycolytic  
557 enzyme metabolon on the human red blood cell membrane. *J Biol Chem* 288(2):848-  
558 858.
- 559 41. Araiza-Olivera D, *et al.* (2013) A glycolytic metabolon in *Saccharomyces cerevisiae*  
560 is stabilized by F-actin. *FEBS J* 280(16):3887-3905.
- 561 42. Graham JWA, *et al.* (2007) Glycolytic enzymes associate dynamically with  
562 mitochondria in response to respiratory demand and support substrate channeling.  
563 *Plant cell* 19(11):3723-3738.
- 564 43. Panicot M, *et al.* (2002) A polyamine metabolon involving aminopropyl transferase  
565 complexes in Arabidopsis. *Plant Cell* 14(10):2539-2551.
- 566 44. Stavrinides A, *et al.* (2015) Unlocking the diversity of alkaloids in *Catharanthus*  
567 *roseus*: nuclear localization suggests metabolic channeling in secondary metabolism.  
568 *Chem Biol* 22(3):336-341.
- 569 45. Mucha S, *et al.* (2019) The formation of a camalexin biosynthetic metabolon. *Plant*  
570 *Cell* 31(11):2697-2710.
- 571 46. Gou M, Ran X, Martin DW, & Liu CJ (2018) The scaffold proteins of lignin  
572 biosynthetic cytochrome P450 enzymes. *Nat Plants* 4(5):299-310.
- 573 47. Fujino N, *et al.* (2018) Physical interactions among flavonoid enzymes in snapdragon  
574 and torenia reveal the diversity in the flavonoid metabolon organization of different  
575 plant species. *Plant J* 94(2):372-392.
- 576 48. Fuchs P, *et al.* (2020) Single organelle function and organization as estimated from  
577 Arabidopsis mitochondrial proteomics. *Plant J* 101(2):420-441.
- 578 49. Lüderitz R & Klemme JH (1977) Isolation and characterization of a membrane-bound  
579 pyruvate dehydrogenase complex from the phototrophic bacterium *Rhodospirillum*  
580 *rubrum*. *Z Naturforsch C Biosci* 32(5-6):351-361.
- 581 50. Phelps A & Lindsay JG (1986) Mammalian pyruvate dehydrogenase complex binds  
582 tightly to the mitochondrial inner membrane. *Biochem Soc Trans* 14(5):893-893.
- 583 51. Millar AH, Hill SA, & Leaver CJ (1999) Plant mitochondrial 2-oxoglutarate  
584 dehydrogenase complex: purification and characterization in potato. *Biochem J* 343 Pt  
585 2(Pt 2):327-334.
- 586 52. Loeber G, Infante AA, Maurer-Fogy I, Krystek E, & Dworkin MB (1991) Human  
587 NAD(+)-dependent mitochondrial malic enzyme. cDNA cloning, primary structure,  
588 and expression in *Escherichia coli*. *J Biol Chem* 266(5):3016-3021.
- 589 53. Pongratz RL, Kibbey RG, & Cline GW (2009) Investigating the roles of  
590 mitochondrial and cytosolic malic enzyme in insulin secretion. *Methods Enzymol*  
591 457:425-450.
- 592 54. Nagel WO & Sauer LA (1982) Mitochondrial malic enzymes. Purification and  
593 properties of the NAD(P)-dependent malic enzyme from canine small intestinal  
594 mucosa. *J Biol Chem* 257(20):12405-12411.
- 595 55. Margineantu DH, Brown RM, Brown GK, Marcus AH, & Capaldi RA (2002)  
596 Heterogeneous distribution of pyruvate dehydrogenase in the matrix of mitochondria.  
597 *Mitochondrion* 1(4):327-338.
- 598 56. Stefan P (1981) In vivo Evidence for a Functional Glycolytic Compartment in  
599 Synchronous Yeast Cells. *Zeitschrift für Naturforschung C* 36(7-8):615-618.
- 600 57. Raugi GJ, Liang T, & Blum JJ (1973) Structural Organization of Three Pools of  
601 Acetyl Coenzyme A in *Tetrahymena*. *J Biol Chem* 248(23):8064-8072.
- 602 58. Srere PA (1987) Complexes of sequential metabolic enzymes. *Annu Rev Biochem*  
603 56:89-124.
- 604 59. Giegé P, *et al.* (2003) Enzymes of glycolysis are functionally associated with the  
605 mitochondrion in Arabidopsis cells. *Plant Cell* 15(9):2140-2151.

- 606 60. Zhang Y, *et al.* (2020) A moonlighting role for enzymes of glycolysis in the co-  
607 localization of mitochondria and chloroplasts. *Nat Commun* 11(1):4509.
- 608 61. Zhang Y & Fernie A (2020) On the detection and functional significance of the  
609 protein-protein interactions of mitochondrial transport proteins. *Biomolecules*  
610 10:1107.
- 611 62. Zwingmann C, Richter-Landsberg C, & Leibfritz D (2001) <sup>13</sup>C isotopomer analysis  
612 of glucose and alanine metabolism reveals cytosolic pyruvate compartmentation as  
613 part of energy metabolism in astrocytes. *Glia* 34(3):200-212.
- 614 63. Hartwell J, Dever LV, & Boxall SF (2016) Emerging model systems for functional  
615 genomics analysis of Crassulacean acid metabolism. *Curr Opin Plant Biol* 31:100-  
616 108.
- 617 64. Rao X & Dixon RA (2016) The Differences between NAD-ME and NADP-ME  
618 Subtypes of C(4) Photosynthesis: More than Decarboxylating Enzymes. *Front Plant*  
619 *Sci* 7:1525-1525.
- 620 65. Maier A, Zell MB, & Maurino VG (2011) Malate decarboxylases: evolution and roles  
621 of NAD(P)-ME isoforms in species performing C(4) and C(3) photosynthesis. *J Exp*  
622 *Bot* 62(9):3061-3069.
- 623 66. Maurino VG & Engqvist MK (2015) 2-hydroxy acids in plant metabolism.  
624 *Arabidopsis Book* 13:e0182.
- 625 67. Tronconi MA, Hüdig M, Schranz ME, & Maurino VG (2020) Independent  
626 recruitment of duplicated  $\beta$ -subunit-coding NAD-ME genes aided the evolution of C4  
627 photosynthesis in Cleomaceae. *Front Plant Sci* 11.
- 628 68. Hüdig M, *et al.* (2021) Respiratory and C4 photosynthetic NAD-malic enzyme  
629 coexist in bundle sheath cells mitochondria and evolved via association of  
630 differentially adapted subunits. *bioRxiv*:2021.2006.2016.448762.
- 631 69. Aubry S, Brown NJ, & Hibberd JM (2011) The role of proteins in C3 plants prior to  
632 their recruitment into the C4 pathway. *J Exp Bot* 62(9):3049-3059.
- 633 70. Furumoto T, *et al.* (2011) A plastidial sodium-dependent pyruvate transporter. *Nature*  
634 476:472.
- 635 71. Netting AG (2002) pH, abscisic acid and the integration of metabolism in plants under  
636 stressed and non-stressed conditions. II. Modifications in modes of metabolism  
637 induced by variation in the tension on the water column and by stress. *J Exp Bot*  
638 53(367):151-173.
- 639 72. Santelia D & Lawson T (2016) Rethinking Guard Cell Metabolism. *Plant Physiol*  
640 172(3):1371.
- 641 73. Post-Beittenmiller D, Roughan G, & Ohlrogge JB (1992) Regulation of plant fatty  
642 acid biosynthesis 1: analysis of acyl-coenzyme A and acyl-acyl carrier protein  
643 substrate pools in spinach and pea chloroplasts. *Plant Physiol* 100(2):923-930.
- 644 74. Camp PJ & Randall DD (1985) Purification and characterization of the pea  
645 chloroplast pyruvate dehydrogenase complex: a source of acetyl-CoA and NADH for  
646 fatty acid biosynthesis. *Plant Physiol* 77(3):571-577.
- 647 75. Ke J, *et al.* (2000) The role of pyruvate dehydrogenase and acetyl-coenzyme A  
648 synthetase in fatty acid synthesis in developing Arabidopsis seeds. *Plant Physiol*  
649 123(2):497-508.
- 650 76. Achnine L, Blancaflor EB, Rasmussen S, & Dixon RA (2004) Colocalization of L-  
651 phenylalanine ammonia-lyase and cinnamate 4-hydroxylase for metabolic channeling  
652 in phenylpropanoid biosynthesis. *Plant Cell* 16(11):3098-3109.
- 653 77. Brailsford MA, Thompson AG, Kaderbhai N, & Beechey RB (1986) Pyruvate  
654 metabolism in castor-bean mitochondria. *Biochem J* 239(2):355-361.

- 655 78. Grigorenko EV, Small WC, Persson LO, & Srere PA (1990) Citrate synthase 1  
656 interacts with the citrate transporter of yeast mitochondria. *J Mol Recognit* 3(5-  
657 6):215-219.
- 658 79. Millar AH, Liddell A, & Leaver CJ (2007) Isolation and Subfractionation of  
659 Mitochondria from Plants. *Methods Cell Biol* 80:65-90.
- 660 80. Le X, Millar AH, & Lee CP (2022) Assessing the kinetics of metabolite uptake and  
661 utilization by isolated mitochondria using selective reaction monitoring mass  
662 spectrometry (SRM-MS). *Methods Mol Biol*.2363:85-100..
- 663 81. Monachello D, Guillaumot D, & Lurin C (2019) A pipeline for systematic yeast 2-  
664 hybrid matricial screening in liquid culture. *Protocol Exchange*.  
665 DOI:10.21203/rs.2.9948/v1
- 666 82. Dreze M, *et al.* (2010) High-quality binary interactome mapping. *Methods Enzymol*  
667 470:281-315.  
668

669 **Figures**

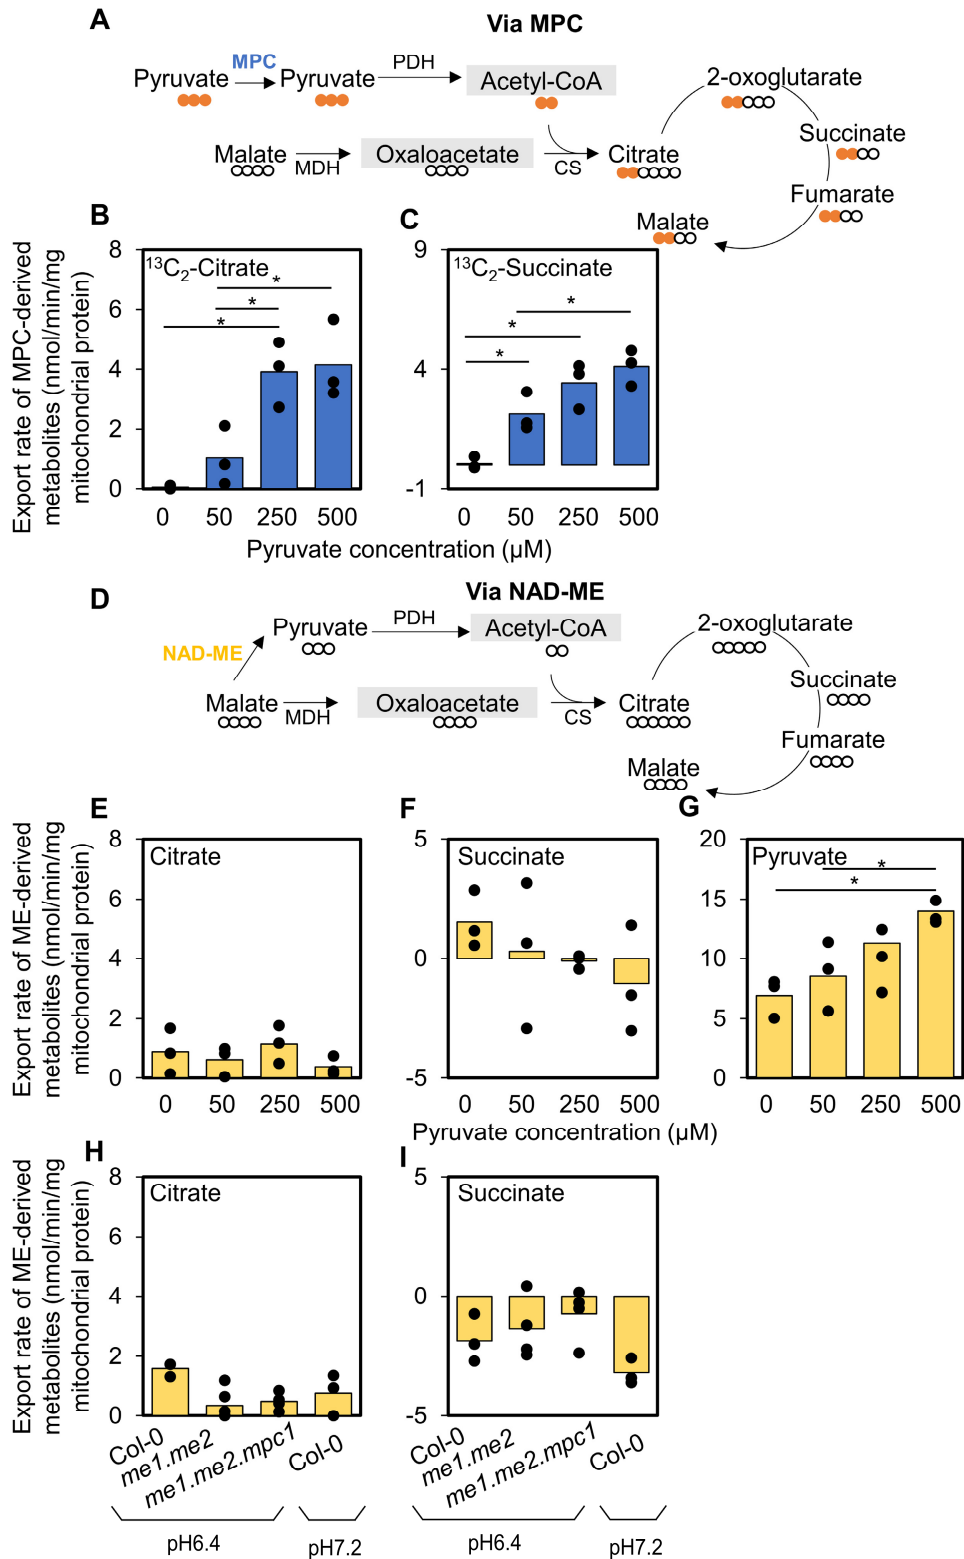

670

671

672 **Figure 1. The usage of imported pyruvate for TCA cycle is preferred to that of NAD-ME-derived**  
673 **pyruvate by Col-0.** (A-G) Mitochondria were incubated and 0, 50, 250 and 500  $\mu\text{M}$  of  $^{13}\text{C}_3$ -pyruvate  
674 in the presence of 500  $\mu\text{M}$  malate and ADP at pH 6.4 to increase ME activity. The isotopic incorporation  
675 patterns of labelled pyruvate and unlabelled malate into citrate via MPC (A) and via NAD-ME (D) are  
676 shown. Bar graphs show export rates of (B)  $^{13}\text{C}_2$ -citrate (via MPC), (C)  $^{13}\text{C}_2$ -succinate (via MPC); (E)  
677 citrate (via NAD-ME), (F) succinate (via NAD-ME), (G) pyruvate (via NAD-ME) of Col-0  
678 mitochondria. (H-I) Col-0, *mel.me2* and *mel.me2.mpc1* mitochondria were incubated in a mixture of  
679 500 $\mu\text{M}$  malate and 500 $\mu\text{M}$   $^{13}\text{C}_3$ -pyruvate at pH6.4 and pH7.2. Bar graphs compare the export rates of  
680 (H) unlabeled citrate (via NAD-ME), (I) unlabeled succinate (via NAD-ME) of Col-0 versus mutant  
681 mitochondria. Quantification was carried out using SRM-MS to directly assess substrate consumption  
682 and product generation of substrate-fed mitochondria after separating mitochondria from the extra-  
683 mitochondrial space by centrifugation through a single silicon oil layer. The rates were calculated from  
684 time course values of metabolite concentration recorded in the extra-mitochondrial space after varying  
685 incubation periods. Each bar represents averaged value from three or more replicates represented by  
686 data points. Significant differences between different pyruvate concentrations and between wildtype  
687 and mutants are denoted by asterisks based on Student's t-tests (\*,  $p < 0.05$ ). Abbreviations: PDH -  
688 Pyruvate dehydrogenase, MDH – Malate dehydrogenase, CS – Citrate synthase.

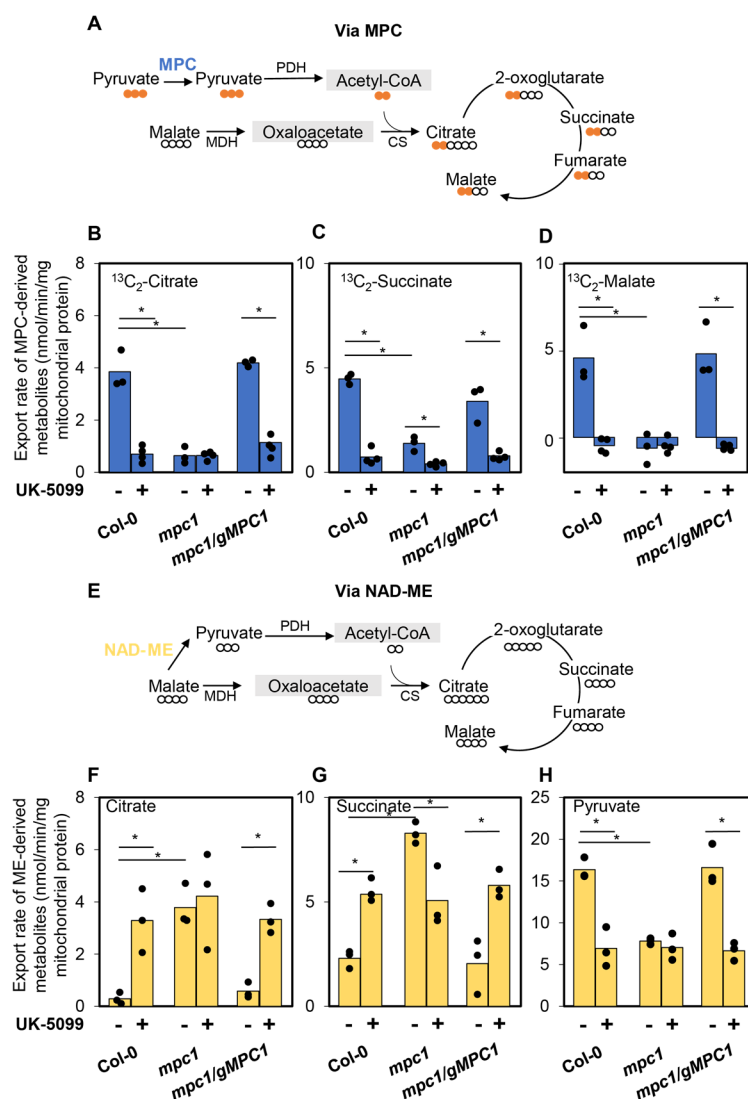

689

690 **Figure 2: The loss of MPC1 changed the pyruvate usage pattern for generating TCA cycle**  
 691 **intermediates.** Col-0, *mpc1* and *mpc1/gMPC1* mitochondria were incubated in a mixture of 500 $\mu\text{M}$   
 692 malate and 500 $\mu\text{M}$   $^{13}\text{C}_3$ -pyruvate at pH6.4. The isotopic incorporation patterns of labelled pyruvate and  
 693 unlabelled malate into citrate via MPC (A) and via NAD-ME (E) are shown. Bar graphs show export  
 694 rates of (B)  $^{13}\text{C}_2$ -citrate (via MPC), (C)  $^{13}\text{C}_2$ -succinate (via MPC), (D)  $^{13}\text{C}_2$ -Malate (via MPC); (F) citrate  
 695 (via NAD-ME), (G) succinate (via NAD-ME), (H) pyruvate (via NAD-ME). Quantification was carried  
 696 out using SRM-MS to directly assess substrate consumption and product generation of substrate-fed  
 697 mitochondria after separating mitochondria from the extra-mitochondrial space by centrifugation  
 698 through a single silicon oil layer. The rates were calculated from time course values of metabolite  
 699 concentration recorded in the extra-mitochondrial space after varying incubation periods. Each bar  
 700 represents averaged value from three or more replicates represented by data points. Significant  
 701 differences between controls and treatments are denoted by asterisks based on Student's t-tests (\*,  $p <$   
 702 0.05).

703

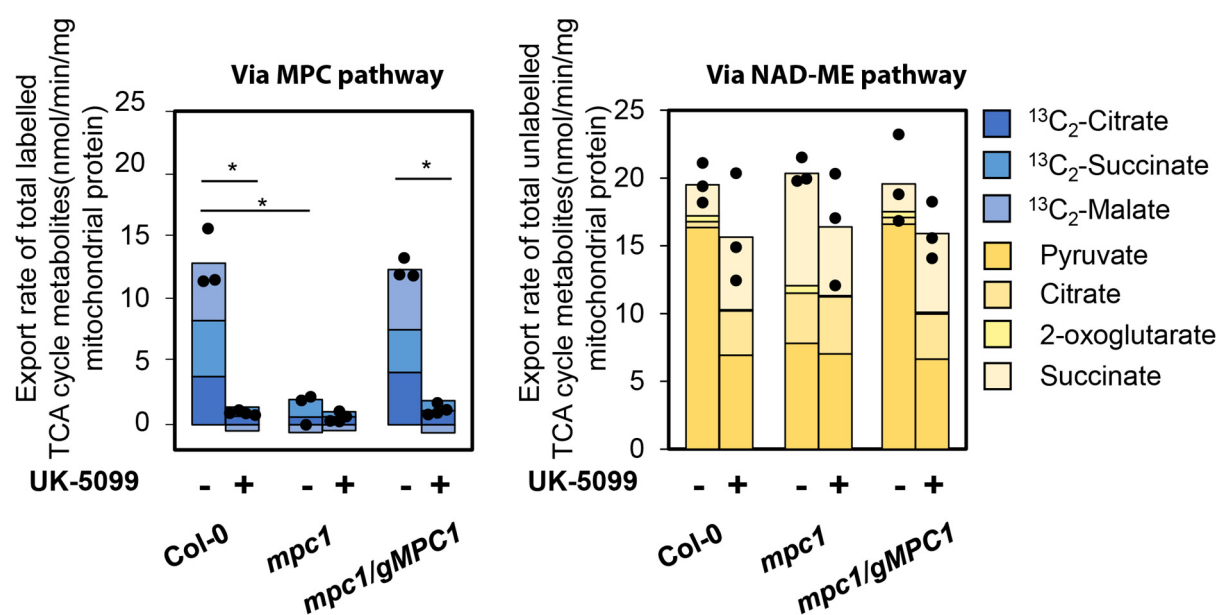

704

705 **Figure 3. The rate of accumulation of total extra-mitochondrial NAD-ME-derived metabolites in**  
 706 **mitochondrial feeding experiments.** Bar graphs show the export rates of total extra-mitochondrial  
 707 amount of MPC-derived metabolites (A) and NAD-ME-derived metabolites (B) when Col-0, *mpc1* and  
 708 *mpc1/gMPC1* mitochondria were fed with 500 $\mu\text{M}$   $^{13}\text{C}_3$ -pyruvate and 500 $\mu\text{M}$  malate at pH 6.4 with and  
 709 without UK-5099. Quantification was carried out using SRM-MS to directly assess substrate  
 710 consumption and product generation of substrate-fed mitochondria after separating mitochondria from  
 711 the extra-mitochondrial space by centrifugation through a single silicon oil layer. The total amount of  
 712 MPC-derived metabolites were the sum of  $^{13}\text{C}_2$ -citrate,  $^{13}\text{C}_2$ -succinate,  $^{13}\text{C}_2$ -malate. The total amount of  
 713 NAD-ME metabolites were the sum of unlabelled pyruvate, citrate, 2-oxoglutarate and succinate. The  
 714 rates were calculated from time course values of metabolite concentration recorded in the extra-  
 715 mitochondrial space after varying incubation periods. Each stacked bar represents averaged value from  
 716 three or more replicates. Data points represented the total amount of metabolites exported of  
 717 independent replicates. Significant differences between controls and treatments are denoted by asterisks  
 718 based on Student's t-tests (\*,  $p < 0.05$ ).

719



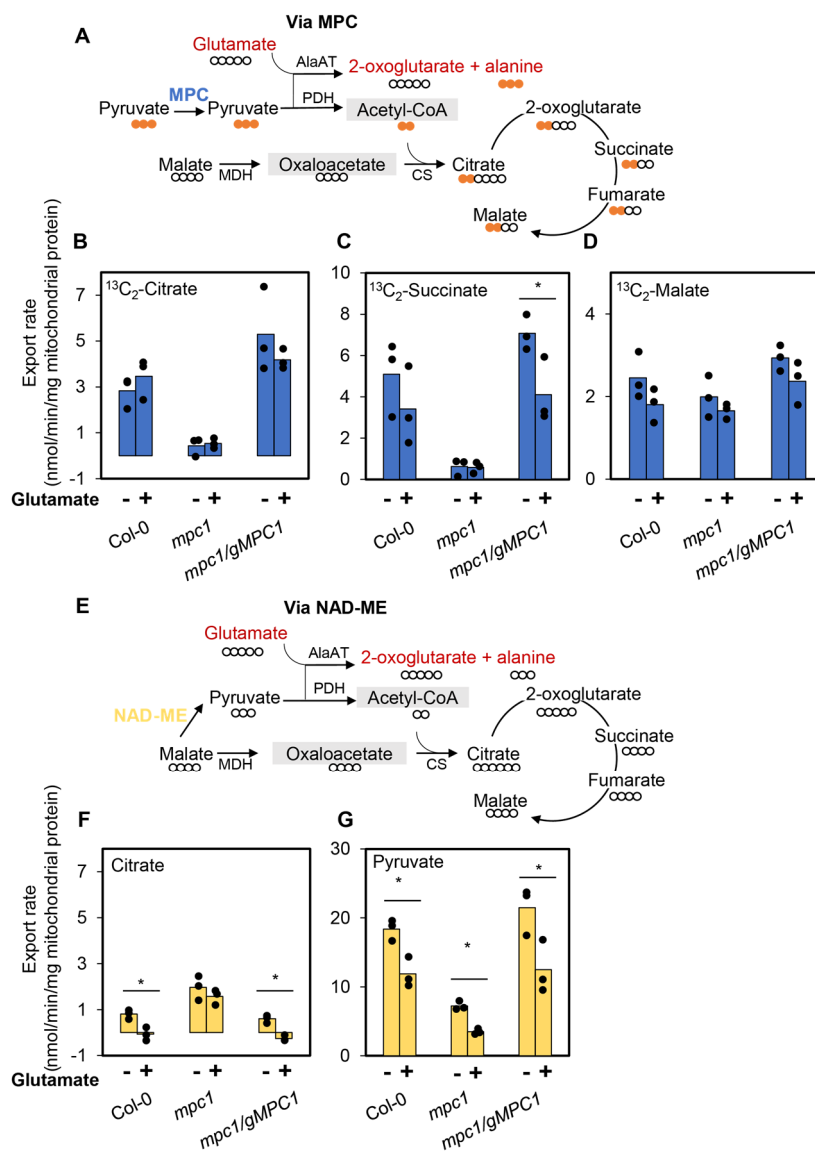

720

721 **Figure 4. The impact of removal of pyruvate by AlaAT on citrate production in Col-0, *mpc1* and**  
 722 ***mpc1/gMPC1* mitochondria.** Mitochondria incubated with 500 μM malate and 500 μM <sup>13</sup>C<sub>3</sub>-pyruvate  
 723 with and without 500 μM glutamate at pH 6.4. The isotopic incorporation patterns of labelled pyruvate  
 724 and unlabelled malate into citrate via MPC (A) and via NAD-ME (E) are shown. Bar graphs show  
 725 export rates of (B) <sup>13</sup>C<sub>2</sub>-citrate (via MPC), (C) <sup>13</sup>C<sub>2</sub>-succinate (via MPC), (D) <sup>13</sup>C<sub>2</sub>-malate (via MPC);  
 726 (F) citrate (via NAD-ME), (G) pyruvate (via NAD-ME). Quantification was carried out using SRM-  
 727 MS to directly assess substrate consumption and product generation of substrate-fed mitochondria after  
 728 separating mitochondria from the extra-mitochondrial space by centrifugation through a single silicon  
 729 oil layer. The rates were calculated from time course values of metabolite concentration recorded in the  
 730 extra-mitochondrial space after varying incubation periods. Each bar represents averaged value from  
 731 three or more replicates represented by data points. Significant differences between controls and  
 732 treatments are denoted by asterisks based on Student's t-tests (\*, p < 0.05).

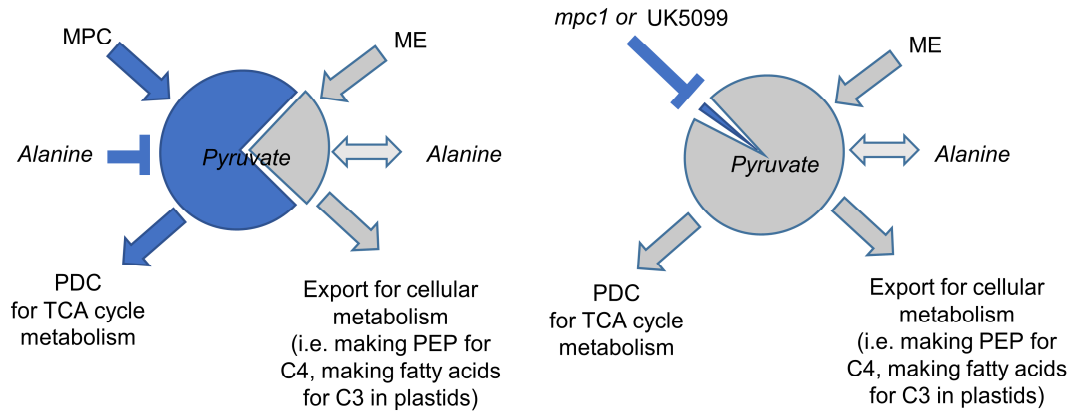

733

734 **Figure 5. Schematic presentation of the source and sink of mitochondria pyruvate pools via MPC**  
735 **(Blue) and NAD-ME (Grey).** In wildtype plants (left), the imported pyruvate pool is prioritised to be  
736 accessed by PDC to make acetyl-CoA which is then condensed with OAA to enter the TCA cycle while  
737 most of the NAD-ME-derived pyruvate pool is exported from the mitochondria for other cellular  
738 processes. In *mpc1* (or UK5099 treated wildtype plants) the imported pool is no longer available and  
739 the NAD-ME-derived pyruvate pool is used for both TCA cycle metabolism and export for other  
740 purposes. AlaAT can readily use the NAD-ME-derived pyruvate pool to make alanine in both wildtype  
741 and MPC-deficient mitochondria, but cannot access pyruvate imported by MPC.

742

743

Supplemental Data Le *et al.*

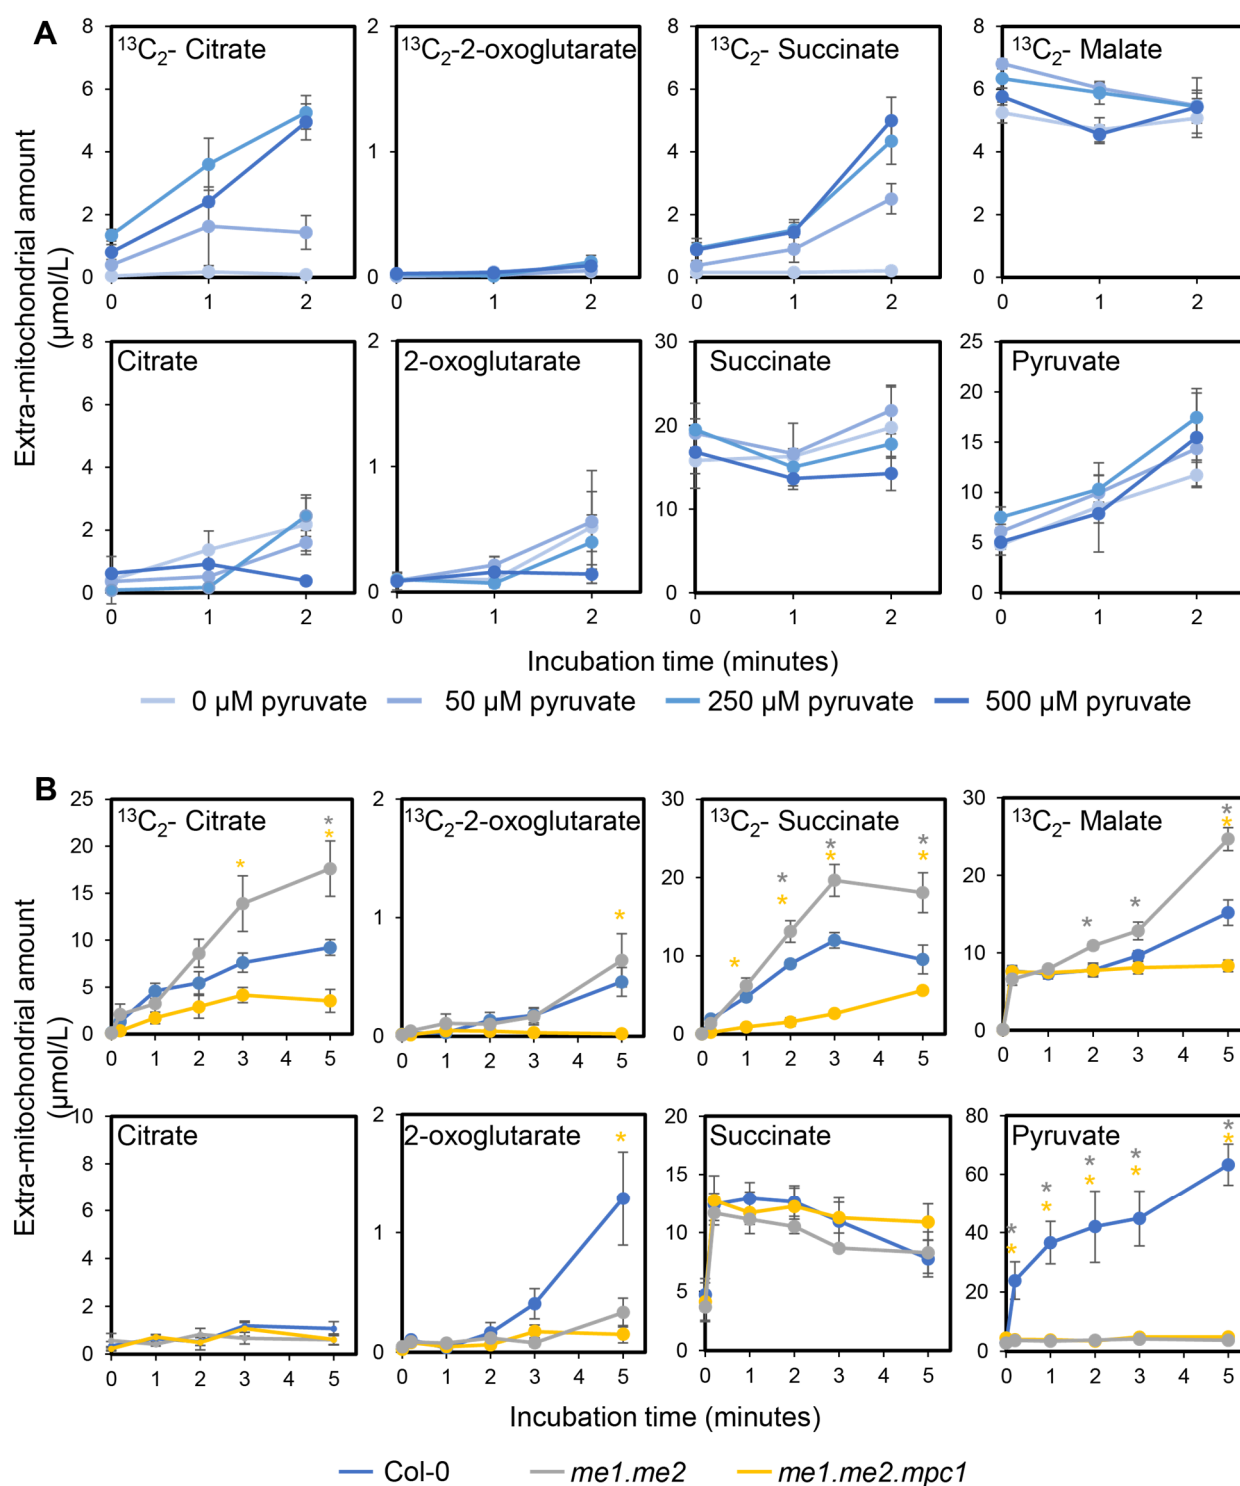

**Supplemental Figure S1. <sup>13</sup>C<sub>3</sub>-Pyruvate and malate feeding to isolated mitochondria of Col-0, *me1.me2* and *mpc1.me1.me2*.** Time courses of metabolite concentrations in the extra-mitochondrial space of isolated mitochondria incubated with 500 μM <sup>13</sup>C<sub>3</sub>-pyruvate and 500 μM malate via the MPC pathway (A) and via the NAD-ME pathway (B). All experiments were conducted in the presence of ADP at pH 6.4 to initiate substrate uptake and consumption by both pathways. Metabolic reaction was stopped by centrifugation through a single silicon oil layer by which the mitochondrial pellet was separated from the extra-mitochondrial medium. Unused substrate and exported products in the extra-mitochondrial medium were quantified using LC-SRM-MS. Each data point represents averaged value from three or more biological replicates with error bars indicate standard error (n≥3). Significant differences between *mpc1*, Col-0 and *mpc1/gMPC1* are denoted by asterisks based on Student's t-tests (\*, p < 0.05). (Supports Figure 1).

Supplemental Data Le *et al.*

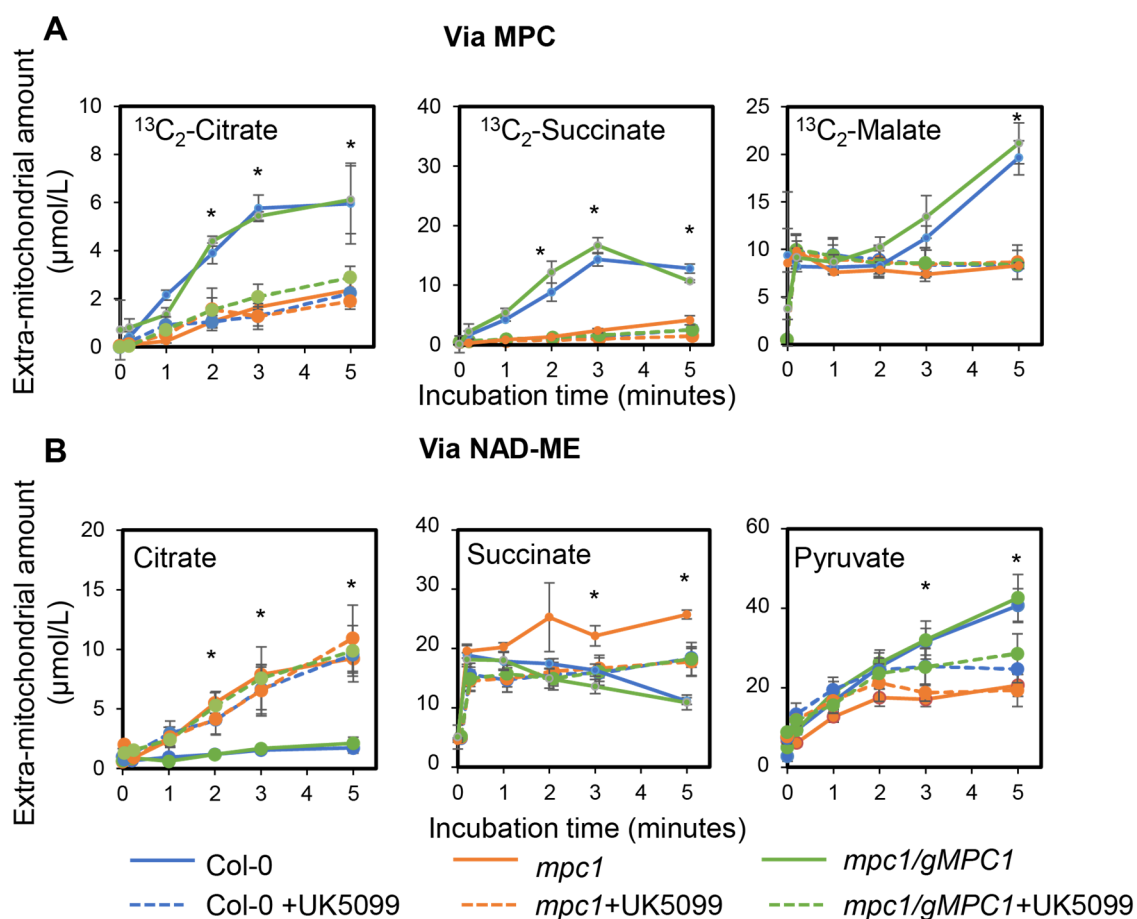

**Supplemental Figure S2.  $^{13}\text{C}_3$ -Pyruvate and malate feeding to isolated mitochondria of Col-0, *mpc1* and *mpc1/gMPC1*.** Time courses of metabolite concentrations in the extra-mitochondrial space of isolated mitochondria incubated with 500  $\mu\text{M}$   $^{13}\text{C}_3$ -pyruvate and 500  $\mu\text{M}$  malate via MPC pathway (A) and via NAD-ME pathway (B). All experiments were conducted in the presence of ADP at pH 6.4 to initiate substrate uptake and consumption by both pathways. Metabolic reaction was stopped by centrifugation through a single silicon oil layer in which the mitochondrial pellet was separated from the extra-mitochondrial medium. Unused substrate and exported products in the extra-mitochondrial medium were quantified using LC-SRM-MS. Each data point represents averaged value from three or more biological replicates with error bars indicate standard error ( $n \geq 3$ ). Significant differences between *mpc1*, Col-0 and *mpc1/gMPC1* are denoted by asterisks based on Student's t-tests (\*,  $p < 0.05$ ) (Supports Figure 2).

Supplemental Data Le *et al.*

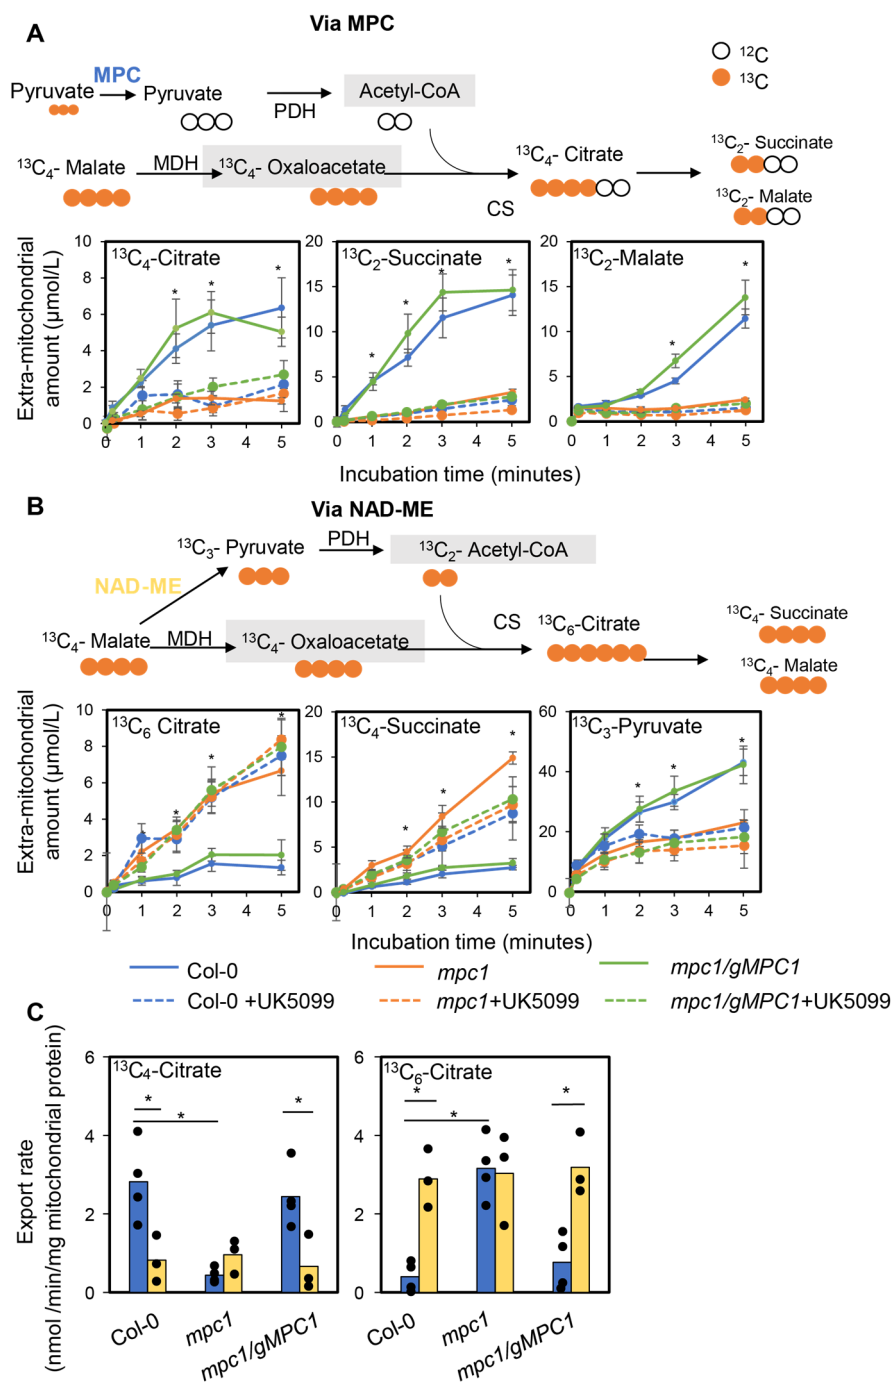

**Supplemental Figure S3. Pyruvate and  $^{13}\text{C}_4$ -malate feeding to isolated mitochondria of Col-0, *mpc1* and *mpc1/gMPC1*.** Time courses of metabolite concentrations in the extra-mitochondrial space of isolated mitochondria incubated with 500  $\mu\text{M}$  pyruvate and 500  $\mu\text{M}$   $^{13}\text{C}_4$ - via MPC pathway (A) and via NAD-ME pathway (B). All experiments were conducted in the presence of ADP at pH 6.4 to initiate substrate uptake and consumption by both pathways. Metabolic reaction was stopped by centrifugation through a single silicon oil layer in which the mitochondrial pellet was separated from the extra-mitochondrial medium. Unused substrates and exported products in the extra-mitochondrial medium were quantified using LC-SRM-MS. Each data point represents averaged value from three or more biological replicates with error bars indicate standard error ( $n \geq 3$ ). Significant differences between *mpc1*, Col-0 and *mpc1/gMPC1* are denoted by asterisks based on Student's t-tests (\*,  $p < 0.05$ ) (C) Bar graphs show the rates calculated from time course values of metabolite concentration recorded in the extra-mitochondrial space after varying incubation periods. Each bar represents averaged value from three or more replicates represented by data points. Significant differences between controls and treatments are denoted by asterisks based on Student's t-tests (\*,  $p < 0.05$ ). (Supports Figure 2).

Supplemental Data Le *et al.*

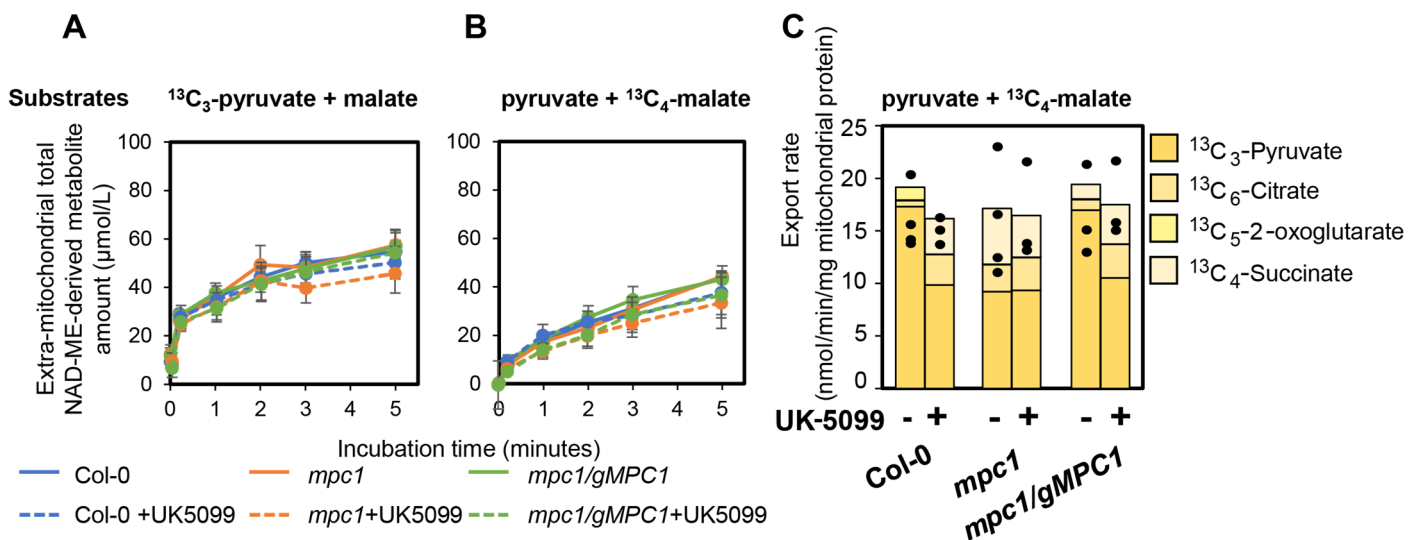

**Supplemental Figure S4. The total amount and the rate of metabolites exported from mitochondria that were made via the NAD-ME pathway.** The total amount of NAD-ME derived metabolites was calculated from time course experiments of either pyruvate and  $^{13}\text{C}_4$ -malate feeding (A, including unlabeled citrate, 2-oxoglutarate, succinate, pyruvate) or pyruvate and  $^{13}\text{C}_4$ -malate feeding (B, including  $^{13}\text{C}_6$ -citrate,  $^{13}\text{C}_5$ -2-oxoglutarate,  $^{13}\text{C}_4$ -succinate,  $^{13}\text{C}_3$ -pyruvate) to isolated mitochondria of Col-0, *mpc1* and *mpc1/gMPC1*. All experiments were performed in the presence of ADP at pH 6.4 to initiate substrate uptake and consumption by both pathways. Metabolic reaction was stopped by centrifugation through a single silicon oil layer in which the mitochondrial pellet was separated from the extra-mitochondrial medium. Unused substrates and exported products in the extra-mitochondrial medium were quantified using LC-SRM-MS. Each data point represents averaged value from three or more biological replicates with error bars indicate standard error ( $n \geq 3$ ). Significant differences between *mpc1*, Col-0 and *mpc1/gMPC1* are denoted by asterisks based on Student's t-tests (\*,  $p < 0.05$ ). (C) Bar graphs show the calculated export rate of all metabolites combined which were made from ME-derived pyruvate after 5 minutes feeding the mitochondria with pyruvate and  $^{13}\text{C}_4$ -malate. Each stacked bar represents averaged value of the indicated metabolite from three or more replicates. Data points represented the total amount of ME-derived metabolites exported in independent replicates. Significant differences between controls and treatments are denoted by asterisks based on Student's t-tests (\*,  $p < 0.05$ ). (Supports Figure 3).

Supplemental Data Le *et al.*

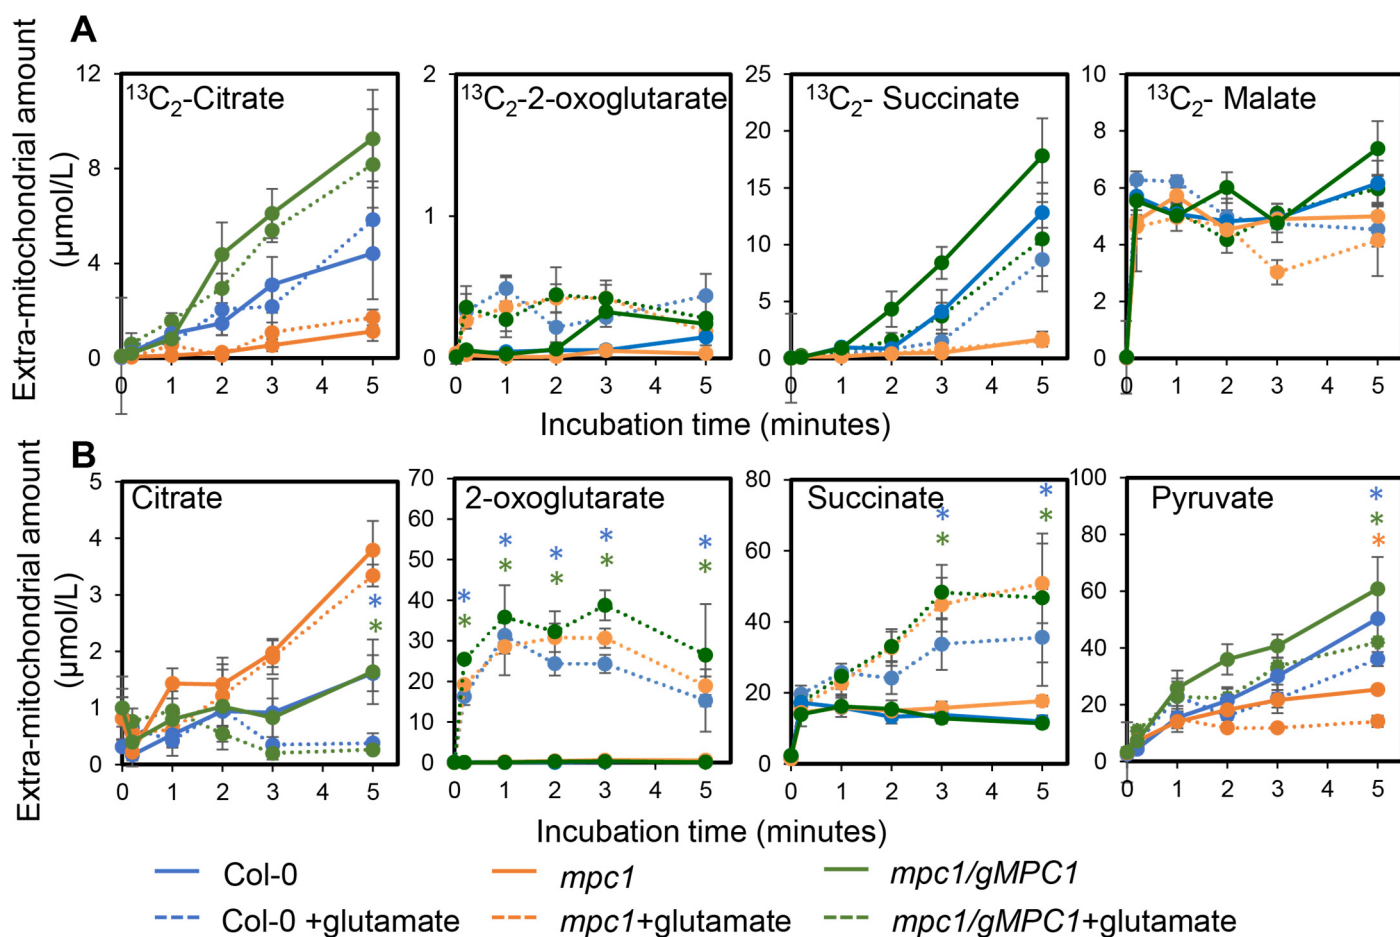

**Supplemental Figure S5.  $^{13}\text{C}_3$ -Pyruvate and malate feeding to isolated mitochondria of Col-0, *mpc1* and *mpc1/gMPC1* with or without the addition of glutamate.** Time courses of metabolite concentrations in the extra-mitochondrial space of isolated mitochondria incubated with 500  $\mu\text{M}$   $^{13}\text{C}_3$ -pyruvate and 500  $\mu\text{M}$  malate with or without the addition of glutamate. All experiments were conducted in the presence of ADP at pH 6.4 to initiate substrate uptake and consumption via both MPC and NAD-ME pathways. Metabolic reaction was stopped by centrifugation through a single silicon oil layer in which the mitochondrial pellet was separated from the extra-mitochondrial medium. Unused substrate and exported products in the extra-mitochondrial medium were quantified using LC-SRM-MS. Line graphs show the amount of  $^{13}\text{C}_2$ -citrate (A), citrate (B) and pyruvate (C) during 5-minute incubation. Each data point represents averaged value from three or more biological replicates with error bars indicate standard error ( $n \geq 3$ ). Significant differences between controls (straight lines) and treatments (dotted lines) are denoted by asterisks based on Student's t-tests (\*,  $p < 0.05$ ) (Supports Figure 4).

Supplemental Data Le *et al.*

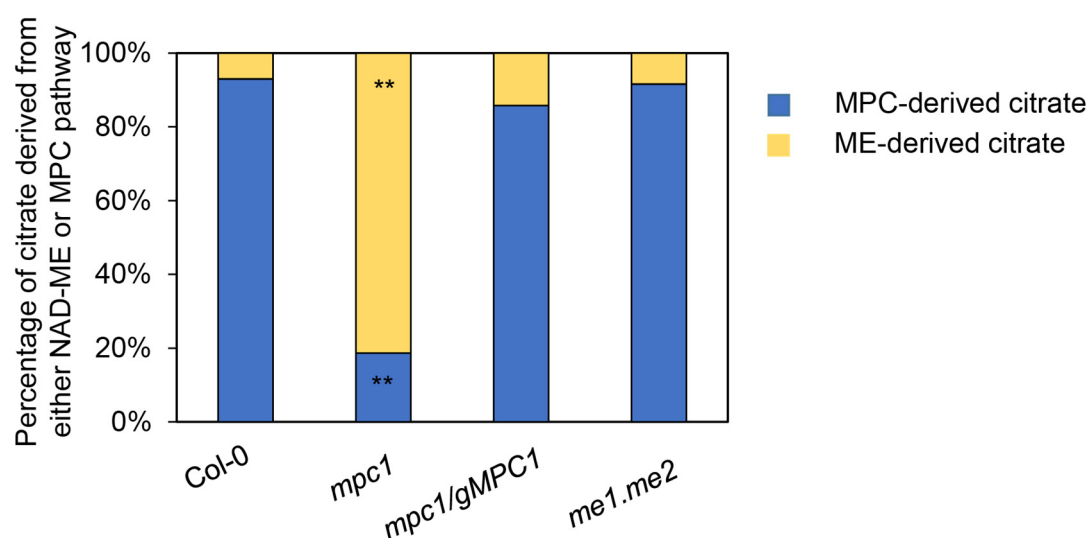

**Supplemental Figure S6. The proportion of citrate derived from difference sources of pyruvate.** Isolated mitochondria incubated with 500  $\mu\text{M}$   $^{13}\text{C}_3$ -pyruvate and 500  $\mu\text{M}$  malate with or without the addition of glutamate in the presence of ADP at pH 6.4 to initiate substrate uptake and consumption to initiate substrate uptake and consumption via MPC and NAD-ME pathways. Metabolic reaction was stopped by centrifugation through a single silicon oil layer by which the mitochondrial pellet was separated from the extra-mitochondrial medium. The amount of citrate (labelled and unlabelled) in the extra-mitochondrial medium were quantified using LC-SRM-MS. Bar graphs show the percentage of  $^{13}\text{C}_2$ -citrate (blue) and citrate (yellow) derived from the MPC and NAD-ME pathways, respectively. Each bar is the averaged value from three or more biological replicates ( $n \geq 3$ ). Significant differences between wildtype and mutants are denoted by asterisks based on Student's t-tests (\*,  $p < 0.05$ ) (Supports Figure 5).
